# Supplementary material for: Staff's perception of abuse in healthcare: a Swedish qualitative study
Source: PubMed Central journal article supplement — BMJ Open. 2012 Sep 26;2(5):e001111. doi: 10.1136/bmjopen-2012-001111 (PMC3467650; doi:10.1136/bmjopen-2012-001111), 2012-09-26
Supplement: bmjopen-2012-001111.draft_revisions.pdf [file bmjopen-2012-001111.draft_revisions.pdf]

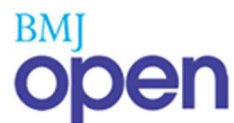

**“A Summoning Stone in the Shoe”: staff’s perception of abuse in health care a qualitative study**

|                                 |                                                                                                                                                                                                            |
|---------------------------------|------------------------------------------------------------------------------------------------------------------------------------------------------------------------------------------------------------|
| Journal:                        | <i>BMJ Open</i>                                                                                                                                                                                            |
| Manuscript ID:                  | bmjopen-2012-001111                                                                                                                                                                                        |
| Article Type:                   | Research                                                                                                                                                                                                   |
| Date Submitted by the Author:   | 13-Mar-2012                                                                                                                                                                                                |
| Complete List of Authors:       | Swahnberg, Katarina; Division of Gender and Medicine, Department of Clinical and Experimental Medicine<br>Wijma, Barbro; Division of Gender and Medicine, Department of Clinical and Experimental Medicine |
| <b>Primary Subject Heading</b>: | Medical education and training                                                                                                                                                                             |
| Secondary Subject Heading:      | Ethics, Health services research, Medical education and training, Qualitative research                                                                                                                     |
| Keywords:                       | EDUCATION & TRAINING (see Medical Education & Training), ETHICS (see Medical Ethics), QUALITATIVE RESEARCH                                                                                                 |
|                                 |                                                                                                                                                                                                            |

SCHOLARONE™  
Manuscripts

1  
2  
3 **TITLE:** “A Summoning Stone in the Shoe”: staff's perception of abuse in health care a  
4  
5 qualitative study  
6  
7

8  
9 **CORRESPONDING AUTHOR:** Katarina Swahnberg PhD, Division of Gender and  
10  
11 Medicine, Department of Clinical and Experimental Medicine, Faculty of Health Sciences,  
12  
13 Linköping University, S-581 83 Linköping, Sweden.  
14

15  
16 Email: [katarina.swahnberg@liu.se](mailto:katarina.swahnberg@liu.se)  
17

18  
19 Phone; + 46 10-103 31 91  
20

21  
22  
23 **AUTHORS:** Katarina Swahnberg, Ph.D, Associate Professor & Barbro Wijma, MD, PhD,  
24  
25 Professor.  
26

27  
28 Division of Gender and Medicine, Department of Clinical and Experimental Medicine,  
29  
30 Faculty of Health Sciences, Linköping University, Sweden.  
31  
32

33  
34 **FUNDING:** The Swedish Research Council  
35  
36

37  
38 **KEYWORDS:** abuse in health care; quality of care; ethics; qualitative method  
39  
40

41  
42 **WORD COUNT:** 4594  
43  
44  
45  
46  
47  
48  
49  
50  
51  
52  
53  
54  
55  
56  
57  
58  
59  
60

## ABSTRACT

**Objective:** The study aim was to apprehend changes in the attitude of health care staff to abuse in health care (AHC) after an intervention, based on 'Forum Play'.

**Design:** In a baseline study, we interviewed 21 staff members who were eligible for participating in the intervention. In this study we interviewed 10 staff members who had participated in the intervention. The interviews were analysed by constant comparative analysis.

**Setting:** A Swedish Women's Clinic.

**Participants:** Two female and one male gynaecologist, one female administrator, four female midwives and two female auxiliaries.

**Intervention:** During January 2008 - January 2009, all staff members (N=136) were invited to participate in Forum Play workshops led by professional Forum Play leaders. Seventy-four participants took part in at least one of the seventeen half-day workshops that were held.

**Primary outcome measures:** Staffs attitudes towards AHC.

**Results:** The core category, 'a summoning stone in the shoe', was constructed of five categories: 'Dehumanising the patient', 'Unacceptable: you are bound to act!', 'Ubiquitous', 'Unintentional' and 'Relative'.

The most important result was the informants' reports that Forum Play had demonstrated possibilities to act even in seemingly "impossible" situations, that they had acted in such situations, and that the taboo status of AHC was broken at the clinic.

When our results were compared to those in the pre-intervention study, we found an *increased* awareness about AHC, *more* concrete examples of AHC, a *stronger* empathy for patients, and *fewer* explanations, justifications and trivialisations of AHC.

**Conclusion:** After an intervention with Forum Play workshops, staff showed a greater willingness not only to acknowledge AHC, but also to take on the responsibility to act in

1  
2  
3  
4  
5  
6  
7  
8  
9  
10  
11  
12  
13  
14  
15  
16  
17  
18  
19  
20  
21  
22  
23  
24  
25  
26  
27  
28  
29  
30  
31  
32  
33  
34  
35  
36  
37  
38  
39  
40  
41  
42  
43  
44  
45  
46  
47  
48  
49  
50  
51  
52  
53  
54  
55  
56  
57  
58  
59  
60

order to stop or prevent AHC. The imperative to act against abuse in health care in the present study stands out as the most important result of the intervention.

For peer review only

## INTRODUCTION

Criticism of health care work is a sensitive issue. Medical errors have to be investigated but what if there was no medical error, but the patient was still dissatisfied or even hurt?

In previous research based on The NorVold Abuse Questionnaire [1-5], we showed that abuse in health care (AHC, defined in Table 1) is prevalent in Sweden; 14-20 per cent in female and 8 per cent in male clinical and population based samples have had such experiences. [3, 6-8] The prevalence in female gynaecology patients in the Nordic countries ranged between 13-28 per cent, while the prevalence in other Nordic male patient and population samples is unknown. [9]

When we asked patients in qualitative interviews what AHC meant to them, both female and male patients expressed feelings of being disempowered and devalued. The core category in the female sample was a feeling of being “nullified” and in the male sample “mentally pinioned”. [10, 11] However, when staff was asked the same question (in the pre intervention study), the answers were quite different. They explained theoretically what AHC could be, e.g. transgression of ethical principles, but they were also occupied with explanations and justifications as to why AHC occurred, and the core category was “ethical lapses”. In accordance with their ambiguity and inability to handle AHC, it was treated with silence and as a taboo. [12] Moreover, staff’s awareness of AHC was dependent on their possibilities to act; no possibility to act no awareness. [13]

For this study we returned to the pre-intervention informants (staff) with the same research question, “What is AHC?” after an intervention against AHC based on Forum Play. Our aim was to evaluate the intervention by means of a design allowing the findings from pre intervention to be compared to those from post intervention qualitative interviews.

## METHODS

### Intervention

Augusto Boal, a Brazilian theatre director and pedagogue, developed many different theatre techniques to liberate people, and Theatre of the Oppressed (TO) is a characterising name used for all his techniques. Influenced by Paulo Freire's *Pedagogy of the Oppressed*, TO became a grassroots movement from the nineteen sixties and on, offering techniques based on empowerment to equip people to transform the conditions in which they were living. [14, 15] Although TO is used worldwide to promote change evaluations of mechanisms and success rates are scarce. [16]

The essence of Forum Play is to create a safe place in a group session, to make the moral conflict clear, to allow feelings but focus on action, and to practice and evaluate new alternatives to act. Discovering and acting out many different solutions to a situation that at first seemed impossible to solve, instils hope in Forum Players. In this intervention, Forum Players are assumed to gradually feel brave enough to transfer their experiences into real life, and try out alternative ways at their work-place to handle or prevent AHC.

During the period January 2008 - January 2009, all staff members at the study clinic (N=136) were invited to participate in Forum Play workshops led by professional Forum Play leaders. [17, 18] All workshops were announced at the local hospital Intranet where staff could also register. Participation was voluntary and there was no limit to the number of workshops a staff member could participate in. Seventy-four participants took part in at least one of the seventeen half-day workshops that were held (74/136=54%).

During the workshops, staff re-enacted (role-played) situations that they had experienced or heard of when patients had felt abused in health care. The situation typically included a bystander who was not intervening but felt that he or she ought to do something, but did not

1  
2  
3 act, as the situation seemed to be without possible “solutions”. The scene was repeated until it  
4  
5 was clear to everyone what the moral conflict was, and who was suffering the moral conflict.

6  
7 [15] Then the scene was played again and the audience was encouraged to intervene. They  
8  
9 could enter the scene and try to change the outcome by taking on the role of the person who  
10  
11 suffered the moral conflict.  
12

13  
14 One example: during a routine pelvic examination the patient says, “please stop, it hurts,” and  
15  
16 the gynaecologist answers, “I am nearly done”. The gynaecologist continues although the  
17  
18 patient is crying loudly. A midwife holds the patient’s hand but does not say anything. In this  
19  
20 situation, one possible intervention for a bystander, in this case the midwife, could be to  
21  
22 reinforce the voice of the patient by asking her, “I see that you are crying - would you like us  
23  
24 to stop this examination now?”  
25  
26  
27  
28

### 29 30 **Material and procedure**

31  
32 In a baseline study, we interviewed 21 staff members who were eligible for participating in  
33  
34 the Forum Play intervention, and who represented four different staff categories. [12, 13]

35  
36 Eligible for the present study were those 14 informants from the original sample who had  
37  
38 participated in the intervention (three staff members had left the clinic, and four had not  
39  
40 participated in the intervention). Four declined participation (one gynaecologist and three  
41  
42 auxiliaries). All interviews were booked by a coordinator employed at the clinic.  
43  
44

45  
46 The two authors interviewed ten informants: two female and one male gynaecologist, one  
47  
48 female administrator, four female midwives and two female auxiliaries.

49  
50 The analysis presented in this study is based on answers to open-ended questions that were  
51  
52 similar to those in the pre-intervention study. The main question used for comparing pre/post  
53  
54 results was: “When I say abuse in health care, what is the first thing that comes to your  
55  
56  
57  
58  
59  
60

1  
2  
3 mind?" Interviews lasted on average 60 minutes. All interviews were tape-recorded and  
4  
5 transcribed verbatim by a secretary.  
6

7  
8 Written informed consent was obtained from all participants before the interview. Our request  
9  
10 to conduct the study had been approved by the regional ethical review board (Registration  
11  
12 number 194-06).  
13

### 14 15 16 **Analysis**

17  
18 We choose a qualitative approach to collect and analyse data according to Barney Glaser but  
19  
20 were also inspired by later work of Janice Morse and Kathy Chamaz. [19-22] Constant  
21  
22 comparative analysis was used to process data [20]. The transcribed interviews were analysed  
23  
24 line by line according to Glaser's scheme of open coding to generate substantive codes, i.e.,  
25  
26 words or sentences with a relationship to the research question. [19, 20] The substantive codes  
27  
28 were constantly compared between interviews to generate new substantive codes and  
29  
30 categories. Finally, the relationship between the categories was analysed and a core category  
31  
32 that answered our research question was identified. [19] No new substantive codes emerged  
33  
34 after the fourth interview. All interviews were analysed to stabilise the categories and reach  
35  
36 saturation. All categories are described in the result section and presented in Table 2. The  
37  
38 interaction between the categories are described under the headline "core category" in the  
39  
40 result section  
41  
42  
43  
44  
45  
46  
47  
48  
49  
50  
51  
52  
53  
54  
55  
56  
57  
58  
59  
60



## RESULTS

### Dehumanising the patient

This category was built on three substantive codes:

1. *“Not finding out where the patient is”*

According to the informants, AHC could signify several things:

Not to imagine what the patient is going through:

*“You have to **imagine**, and **understand** the things you **say**; what **are** the consequences...what do you **do** and what will be the consequences. How will it be in **this** situation? For sometimes an act can **be** rather innocent, and in some situations, [certain] behaviour can be completely **catastrophic**.”*

To belittle a patient’s problem by comparing with other patient’s problems:

*“Yes, to listen to what the other is talking about...to be focused on the one in front of you. Yes, seriously, even [when you] think that’s a silly little thing compared to the death [a dying person]...in the next room.”*

To be judgmental:

*“If someone is admitted, there are not so many of them here but, gipsies...Have you locked away your handbag? Where is my purse? They are judged awfully hard.”*

Lack of cultural awareness:

1  
2  
3 Expecting that patients with a foreign background live by and accept Swedish norms like in  
4  
5 the following example might also render in AHC, according to one informant who had had to  
6  
7 console a crying patient after an examination.  
8

9  
10 *“When she came it was a shock for her [that it was a male gynaecologist] and she told them*  
11 *that...she was going to see a female [gynaecologist] and then they had answered her that well*  
12 *but you can’t always get...what you ask for...if you seek help at such short notice then you*  
13 *have to take what you can get. Everything was supposed to be quick and she just felt that she*  
14 *was just...trouble for them... And she was...so sad afterwards.”*  
15  
16  
17  
18  
19

## 20 21 22 23 2. “Saying things that are very abusive”

24  
25 According to the informants, AHC can be something you say or the way you say it; a few  
26  
27 words may turn a situation into a disaster for a patient.  
28

29  
30 One example: a patient with cancer was constantly throwing up. Staff had provided her with  
31  
32 bags and bowls but nothing helped, repeatedly there was vomit everywhere: on the bedside  
33  
34 table, in the bed and all over her things. Staff thought that she was capable of using the bags  
35  
36 and bowls, and discussed between them if she did it on purpose. There were sighs among the  
37  
38 staff, sometimes even audible to the patient, according to the informant. One day, a staff  
39  
40 member asked the patient if she was going to continue like this when she would go home.  
41

42  
43 Another informant remembered her own first delivery: the baby’s heart sounds were getting  
44  
45 worse, the suction cup did not work, she had intravenous fluids running in both arms, and she  
46  
47 was screaming in pain. Then the doctor came up to her and said, “Are we going to cooperate  
48  
49 for hell’s sake!” Afterwards she felt abused and despite her longing for another child it took  
50  
51 years before she decided to have a second baby.  
52

53  
54 Informants said that they used to think that AHC had to be a major thing, but that they now  
55  
56 realised that AHC was often an unexpectedly small thing, and that a good situation could turn  
57  
58  
59  
60

1  
2  
3 into a disaster because of a small thing. As mentioned above, the sex of the examiner might  
4  
5 sometimes be crucial for the patient for religious or other reasons, while some staff members  
6  
7 may consider it a small thing.  
8  
9

10  
11  
12 3. *“They must have felt very vulnerable”*  
13

14 An informant told us about a patient that she had known for a long time whom she thought of  
15  
16 as extremely nervous and inadequate. The patient had told her that she was afraid of hospitals.  
17  
18 Later she also told her that she had been forced to go through a gynaecological examination  
19  
20 when she was a child, on suspicion that she had been sexually abused by or involved with an  
21  
22 older boy.  
23

24  
25 *“... she [the mother] only said, ‘now we are going to town’. And then they brought her to the*  
26  
27 *gynaecological ward and then they **fixated her tightly** and she was examined. And she*  
28  
29 ***screamed** and she **kicked** and she was **struggling** with them. And she said that she can’t*  
30  
31 *forget this ...it is stuck with her that...that they pushed her down and **forced** her, and so on.*  
32  
33 *So I think that’s a typical example of abuse in the health care and for **ten** years I’ve been*  
34  
35 *wondering what’s wrong with this girl.”*  
36  
37

38 Power and power imbalance in relation to AHC was mentioned in several ways, e.g., the  
39  
40 exposed position a woman has during a gynaecological examination or the patients’  
41  
42 dependency on staff’s willingness to help and to be gentle to them: *“You are not your own*  
43  
44 *master then.”*  
45  
46

47 One informant was also pondering about her ability to really understand what it meant to be  
48  
49 dependent and exposed as a patient:  
50

51  
52 *“...I still think that I can feel...that you can imagine...the dependency...get an understanding*  
53  
54 *about how it is...I can never understand, but I can feel humble...I can share it...I can have*  
55  
56 *respect and understand that she has something else with her that I haven’t got.”*  
57  
58  
59  
60

1  
2  
3 AHC could also mean that advantage is taken of the power inherent of one's position,  
4  
5 symbolised by, e.g., the uniforms: "...when you put on your work clothes, then you have a  
6  
7 kind of...how to say it, a power position."  
8  
9

10  
11 **Unacceptable: you are bound to act!**  
12

13  
14 The informants were prone to positioning themselves against AHC by, e.g., talking about how  
15  
16 they had (re)acted against AHC, and that it could be done in a good way, "...but then I think  
17  
18 you have an obligation... to rebuke. In a loving way." They also emphasised that the  
19  
20 bystander had a very important role in noticing and stopping or preventing AHC, "because  
21  
22 sometimes I think that it is the person who stands by...maybe more often senses when  
23  
24 something goes wrong than the person who is [active] in the situation".  
25  
26

27 There were different strategies for intervening against potentially abusive situations:  
28

29 One informant was concerned about open doors and meant that staff leaving doors open  
30  
31 jeopardised a patient's integrity. She was struggling with this problem:  
32

33  
34 "...it is an indication that you probably can't miss [with laughter in her voice]. No, but  
35  
36 sometimes when you have been sitting in the auxiliaries' expedition, there is just a sliding  
37  
38 door...there are patients sitting right outside and then I close the door...or when  
39  
40 you...hear...that they...are in a room talking and so on. Close the doors...and I close that  
41  
42 door [the sliding door] and then it's open again! And I close it."  
43  
44

45 Practical arrangements for preventing AHC were discussed:  
46

47  
48 "...there are more discussions about this [now]. **About...**for example, open the door into a  
49  
50 room where a patient is and...how to **place** patients in a room, and how many really have to  
51  
52 come into a room. So, these kinds of questions."  
53  
54  
55  
56  
57  
58  
59  
60

1  
2  
3 It was also put forward that small talks over a cup of coffee could raise awareness about AHC  
4 among staff, but to talk to the patient, either before or after AHC had occurred, was seldom  
5 mentioned as an intervention. One informant interpreted this particular kind of silence as fear:  
6  
7

8  
9  
10 *"It must be some kind of ...fear to...realise that you are not perfect. Maybe!...Of course if you*  
11 *ask then you have to be prepared...to do something about what the patient might bring up."*  
12

13  
14 In other words, asking a patient about AHC might force staff to take action, e.g., towards a  
15 colleague. Some informants stressed the importance of being earnest in such situations and  
16 talk directly to the staff involved as soon as possible. This was what the informant did who  
17 told us about the patient who expected to be examined by a female gynaecologist. When she  
18 had comforted the patient she asked her if she could talk to the staff member who had  
19 examined her, and if the patient wanted to participate in such a meeting. The patient declined t  
20

21  
22 *"...I was allowed to tell...how she had experienced it...I was so disturbed by what she told*  
23 *me. So I felt that I had to find out if that was how it had happened. But he had not really*  
24 *experienced it that way..."*  
25  
26

27  
28 Furthermore, there was a possibility to report upwards in the hierarchy: *"I would not hesitate*  
29 *to...contact...[silence] a foreman, my bosses [if a patient was abused]."* And there was a  
30 consensus on having an open climate at the clinic, and that it was important to be made aware  
31 when a patient was abused. Speaking up against AHC was considered an option for most  
32 informants:  
33

34  
35 *"That you say, 'you can't behave like that'. So I believe that...people would tell you...I*  
36 *believe that there are few who would not dare to speak up...I believe they would speak to a*  
37 *colleague."*  
38  
39  
40  
41  
42  
43  
44

### Ubiquitous

AHC was often described in a broad sense as something that can happen to anyone at any age: patients, staff, relatives and friends to the patient. Anybody can become a victim or an agent (actor or bystander) of AHC: “...we are abusing each other...all the way down to the patient...”

AHC was also interpreted as staff being abusive against other staff, for instance by making remarks in a harsh way. It was also pointed out that a patient who had witnessed staff treating each other badly might feel hesitant to ask even important questions for their own sake.

One abusive situation between members of staff described as common was when a midwife called for a doctor and that doctor called for another doctor, and the two of them did not involve the midwife when they discussed the patient.

It was also hypothesised that staff experiencing abuse from other staff might subconsciously take it out on someone else: “...if I am abused then I will look for someone...that...I have power over.” And that someone is likely to be a patient: “...it is easier to abuse when there is some kind of power relation... and when there is a kind of malady between us.”

However, patients abused by staff were considered the most serious kind of AHC: “...the most serious is if we, the staff...abuse patients or relatives. That is another situation I believe.”

Informants also agreed that patients were the most common victims of AHC, and that if patients abused staff it should be understood differently: “Because there might be...patients who abuse staff in many ways, so to say. But on the other hand, they are in another position...worry can turn you...rather nasty, really.”

## Unintentional

AHC was believed to be a common experience among patients. Most informants said that AHC was usually unintentional on behalf of the staff, and that often involved staff was not even aware that it had happened. *“...they are not aware, surely. But then I have to...become aware of how people might experience what I do.”*

A variety of explanations of the occurrence of AHC were brought forward, and it was pointed out several times that AHC did not come from evilness in staff members, but rather from a lack of consideration and empathy.

Not being reflective could result in a routine manner or performance. One example given was that of an authority, like the gynaecologist who was often believed to be under time restraints, who simply follows an old habit: focusing on getting things done instead of on the patient. *“...it’s so easy to follow... the same footsteps all the time...”*

Another example of unintentional AHC was when staff members made jokes between themselves about, e.g., someone being fat, and other staff members were laughing without reflecting on what they were laughing at, or if they ought to put an end to it.

It was also brought forward that unawareness of AHC could be due to inadequate communication skills, e.g., if staff was not sensible enough to read the patient’s body language.

The uniqueness in each and everyone’s characters was appreciated, but sometimes, if a colleague was known to be harsh without meaning it or even noticing it her- or himself, there was a moral conflict. A bystanding staff member would in such a situation understand that the patient might feel abused, and at the same time know that the “harsh” staff member did not mean to abuse the patient. This was considered a difficult situation, but as one informant concluded,

1  
2  
3 *“...it’s about personality, too, so it’s really difficult to know how to tackle it. It’s interesting*  
4 *that people are different, but on the other hand you don’t want those differences to befall the*  
5 *patients so that they feel abused, or maltreated.”*  
6  
7  
8  
9

### 10 11 **Relative**

12  
13  
14 The informants were provoked by the word “abuse” in AHC, and prone to take a defending  
15 position against it. They thought of “abuse” (kränkning in Swedish) as a very strong word,  
16 that was sometimes used too often and in an inappropriate way. The informants thought that,  
17 especially in the rest of the society (outside the hospital), the word “abuse” had suffered  
18 inflation. *“I think that ‘abuse’ may be a tough word...It’s a worn out word or a word that is*  
19 *used incorrectly...”*  
20  
21  
22  
23  
24  
25  
26

27 Informants agreed that AHC was a difficult concept to define. On the one hand, AHC was  
28 considered a strong word, and yet AHC could be a small thing. *“...there is no such...scientific*  
29 *quantitative concept [saying] that this is abuse.”*  
30  
31  
32  
33

34 The wording seemed important to the informants and a more neutral word for AHC was  
35 desired by the informants, e.g., (negative) encounters (bemötande in Swedish).  
36  
37

38 AHC was considered a personal experience, and it was expressed that patients were more or  
39 less vulnerable to this experience. It was also brought forward that there were reasonable  
40 experiences that made some patients more vulnerable to AHC than others, e.g., through a  
41 history of abuse.  
42  
43  
44  
45  
46  
47  
48

### 49 **Core category**

50  
51  
52 The three categories ‘Dehumanising the patient’, ‘unacceptable: you are bound to act!’ and  
53 ‘ubiquitous’ are strongly linked to each other in many ways, not the least because of their  
54 potentially patient protective components. The category ‘Dehumanising the patient’ implies  
55  
56  
57  
58  
59  
60



1  
2  
3 not being seen as a human being, stripped of human value. The codes that filled out this  
4  
5 category were characterised by moral imagination and respect for the patient's situation. The  
6  
7 informants showed great insight into patients' vulnerability and their own responsibility in  
8  
9 relation to AHC. The fact that the informants gave several detailed examples of AHC  
10  
11 underlined their emotional engagement. This engagement was a strong reason for staff to  
12  
13 adopt a clear position against AHC, expressed in the category 'unacceptable: you are bound to  
14  
15 act!' It was also made clear that acting against AHC was beneficial not only for the patient but  
16  
17 also for staff: "...that's what we really ought to do [talk to each other when we think a patient  
18  
19 might feel abused]...we take responsibility for each other that way."

20  
21  
22 The open attitude among staff toward AHC, represented in the category 'ubiquitous',  
23  
24 indicated that the informants were now more prone to recognise AHC. This openness could be  
25  
26 seen as a mediator that enabled staff to talk about AHC, which probably contributed to a  
27  
28 milieu where staff felt some pressure to also act against AHC. However, there were  
29  
30 contradictions in the staff's definitions of AHC. To claim that AHC was 'unintentional' was a  
31  
32 way to describe a fact, and at the same time make AHC trivial. Likewise, the discussion that  
33  
34 rendered a 'relative' definition of AHC could be seen as a diversion from a topic that  
35  
36 provoked awkward feelings. Both of these categories could be used to legitimize AHC.  
37  
38 Despite this "resistance", the overall conclusion is that AHC summons responsibility and  
39  
40 urges an itch to act among staff. From having been considered a matter of mishaps - "ethical  
41  
42 lapses" - AHC had become "a summoning stone in the shoe". By this is meant that acting  
43  
44 against AHC had become an imperative. See also Table 2!  
45  
46  
47  
48  
49  
50  
51  
52  
53  
54  
55  
56  
57  
58  
59  
60

## DISCUSSION

This study evaluates, by means of qualitative “post” interviews, if there was a change in staff members’ attitudes towards AHC after an intervention based on Forum Play.

In our earlier pre-intervention studies, staff reported detached attitudes towards AHC and AHC had a taboo status at the study clinic. [12, 13] They recognised AHC as ‘transgressions of ethical principles’ but stated that these actions were often justifiable from a staff perspective for various reasons. [12] Staff’s awareness of AHC also turned out to be a complex phenomenon restricted by their possibilities to act e.g., caused by hierarchies or because they did not know what to do since they had no tools or training in handling AHC. [13] The strongest expressions of change in the present study, when compared to the pre-intervention studies, was the *increased* awareness about AHC, *stronger* empathy for patients displayed in *more* concrete examples of, and *fewer* explanations, justifications and trivialisations of AHC. The increase of concrete examples of AHC was most likely a manifestation of the increased awareness of AHC among staff.

Moreover, the answers to the question, “what is AHC?” in the present study, are closer to the experiences of both female and male patients than those of the study that posed the same question to staff prior to the intervention, where the core category was ‘ethical lapses’. [10-12] Apparently, staff’s perspective had moved closer to the patient’s perspective.

AHC had become ‘a summoning stone in the shoe’ i.e., something nagging, that they were aware of and had to “take out” to be comfortable again. The imperative to act against AHC in the present study stands out as the most important result of the intervention.

The mechanisms for the effect that we saw are most likely, 1. Forum Play had showed staff that there were possibilities to act, and 2) the taboo status of AHC had been broken at the

1  
2  
3 clinic. The informants told us that AHC was present more often in their daily conversations,  
4  
5 and it was even discussed during coffee breaks, i.e. AHC had become a shared problem.  
6  
7 According to Galtung, direct events of violence are always accompanied and legitimised by  
8  
9 cultural and structural violence, forming a vicious triangle. [23, 24] While events of direct  
10  
11 violence often are visible, cultural and structural violence are often not. A taboo can  
12  
13 exemplify cultural violence. Breaking the taboo should be seen as a way to delegitimize direct  
14  
15 events of AHC, and Forum play seems to have been a useful tool for this purpose since the  
16  
17 “culture” had changed between the pre and post intervention interviews and talking about and  
18  
19 acting against AHC had become “the right thing to do”.

20  
21  
22 The resistance against and disavowal of AHC found in the pre-intervention studies had not  
23  
24 only decreased, it had also changed character. [12, 13] For example, before the intervention  
25  
26 informants strongly emphasized that they were abused too. Now they had attained a more  
27  
28 general and less defensive view; anybody could get involved in AHC as an actor or a victim.  
29  
30 Moreover, it was considered much worse if a patient was abused by staff, because staff had  
31  
32 more powerful positions than patients and they were entrusted with the patients’ vulnerability.  
33  
34 AHC was still considered to be acted out unintentionally, but the argument was no longer  
35  
36 used to explain or justify AHC. Instead it was used as an incentive to become more aware  
37  
38 about AHC.  
39  
40

41  
42 How to define AHC was still problematic to the informants. Obviously AHC had been a new  
43  
44 terminology for them, but the wish to rename AHC into a more “comfortable” concept is  
45  
46 interesting. It is likely that the concept AHC gradually will be exchanged for the more neutral  
47  
48 “a failing encounter” at this clinic.  
49

50  
51 To conduct qualitative interviews pre and post intervention gave us a deeper understanding of  
52  
53 changes that might have been pointed out but not thoroughly explained by means of e.g.  
54  
55 repeated quantitative measures. On the other hand the approach also involves risks, e.g. the  
56  
57  
58  
59  
60

1  
2  
3 authors' involvement in the project could be assumed to increase the risk for bias both on  
4  
5 behalf of the researchers, i.e. doing interpretations favourable to the project's success rate, as  
6  
7 well as on behalf of the informants, i.e., a social desirability bias. [25] In an effort to  
8  
9 counteract these biases, external independent researchers repeated interviews as well as  
10  
11 analyses. An external researcher analysed de novo the interviews in the present study. This  
12  
13 analysis also showed that staff's attitudes toward AHC had approached the patient perspective  
14  
15 (submitted paper). New interviews were conducted by a consultant who was not involved in  
16  
17 the project and with a different sample of staff who had also participated in the intervention.  
18  
19 The results described a positive change from before till after the intervention, not only in  
20  
21 attitudes but also in action. Several examples were given where staff members had been  
22  
23 "experimenting" with different ways to prevent or handle AHC, also where it meant  
24  
25 confronting a colleague. [26]  
26  
27  
28  
29  
30

## 31 CONCLUSION

32  
33  
34  
35  
36 After an intervention with Forum Play workshops, staff showed a greater willingness not only  
37  
38 to acknowledge AHC, but also to take on a responsibility to act in order to stop or prevent  
39  
40 AHC.  
41  
42  
43  
44  
45  
46  
47  
48  
49  
50  
51  
52  
53  
54  
55  
56  
57  
58  
59  
60

**REFERENCES**

1. Wijma B, Schei B, Swahnberg K. NorAQ. The NorVold Abuse Questionnaire. Linköping: Division of Gender and Medicine, Faculty of Health Sciences, Linköping University, 2004.
2. Wijma B, Schei B, Swahnberg K et al. Emotional, physical, and sexual abuse in patients visiting gynaecology clinics: a Nordic cross-sectional study. *Lancet* 2003;**361**(9375):2107-13.
3. Swahnberg K. Prevalence of gender violence. Studies of four kinds of abuse in five Nordic countries [Doctoral Thesis]. Faculty of Health Sciences, Linköping University, 2003.
4. Swahnberg K. NorVold Abuse Questionnaire for men (m-NorAQ): validation of new measures of emotional, physical, and sexual abuse and abuse in health care in male patients. *Gend Med* 2011;**8**(2):69-79.
5. Swahnberg K, Wijma B. The NorVold Abuse Questionnaire (NorAQ): Validation of new measures of emotional, physical, and sexual abuse, and abuse in the health care system among women. *Eur J Public Health* 2003;**13**(4):361-6.
6. Swahnberg K, Davidsson J, Hearn J et al. Men's experiences of emotional, physical and sexual abuse, and abuse in health care: A cross-sectional study of a Swedish random male population sample. *Scand J Public Health. In press* 2011.
7. Swahnberg K, Hearn J, Wijma B. Prevalence of perceived experiences of emotional, physical, sexual, and health care abuse in a Swedish male patient sample. *Violence and Victims* 2009;**24**(2):275-86.
8. Swahnberg K, Wijma B, Schei B et al. Are sociodemographic and regional and sample factors associated with prevalence of abuse? *Acta Obstet Gynecol Scand* 2004;**83**(3):276-88.

- 1  
2  
3 9. Swahnberg K, Schei B, Hilden M et al. Patients' experiences of abuse in health care: a  
4  
5 Nordic study on prevalence and associated factors in gynecological patients. *Acta*  
6  
7 *Obstet Gynecol Scand* 2007;**86**(3):349-56.  
8
- 9  
10 10. Swahnberg K, Thapar-Bjorkert S, Bertero C. Nullified: women's perceptions of being  
11  
12 abused in health care. *J Psychosom Obstet Gynaecol* 2007;**28**(3):161-7.  
13
- 14 11. Swahnberg K, Wijma B, Hearn J et al. Mentally pinioned: Men's perceptions of being  
15  
16 abused in health care. *Int J Mens Health* 2009;**8**(1):60-71.  
17
- 18 12. Swahnberg K, Zbikowski A, Wijma B. Ethical lapses: staff's perception of abuse in health  
19  
20 care. *J Psychosom Obstet Gynaecol* 2010;**31**(3):123-9.  
21
- 22 13. Swahnberg K, Wijma B. Staff's awareness of abuse in health care varies according to  
23  
24 context and possibilities to act. *J Psychosom Obstet Gynaecol* 2011;**32**(2):65-71.  
25
- 26 14. Freire P. Pedagogy of the Oppressed - Divide and Oppress. *Casa De Las Americas*  
27  
28 1986(159):148-51.  
29
- 30 15. Boal A. *Games for actors and non-actors*. London/New York: Routledge, 1992.  
31
- 32 16. Österlind E. Acting out of habits – can Theatre of the Oppressed promote change? Boal's  
33  
34 theatre methods in relation to Bourdieu's concept of habitus. *Research in Drama*  
35  
36 *Education: The Journal of Applied Theatre and Performance* 2008;**13**(1):71-82.  
37
- 38 17. Stocker SS. Staging the Moral Imagination in the Health Care Setting. Linköping:  
39  
40 Division of Gender and Medicine, Faculty of Health Sciences, Linköping University,  
41  
42 2011.  
43
- 44 18. Josephson A. Praktisk kunskap i att förhindra kränkningar. Rapport om dramapedagogiskt  
45  
46 arbete med vårdpersonal (Practical knowledge in counteracting abuse in health care.  
47  
48 Report on drama pedagogic work among health care staff). Linköping: Division of  
49  
50 Gender and Medicine, Faculty of Health Sciences, Linköping University, 2011.  
51  
52
- 53 19. Glaser B. *Theoretical sensitivity*. 4 ed. Mill Valley, CA: Sociology Press, 1978.  
54  
55  
56  
57  
58  
59  
60

- 1  
2  
3 20. Glaser B. *Basics of grounded theory analysis. Emergence versus forcing*. Mill Valley,  
4  
5 CA: Sociology Press, 1992.  
6  
7 21. Morse JM, editor. *Developing grounded theory. The second generaton*. Walnut Creek:  
8  
9 Left coast press, INC, 2009.  
10  
11 22. Charmaz K. *Constructing Grounded Theory. A practical guide through qualitative*  
12  
13 *analysis*. London: SAGE Publications Ltd, 2009.  
14  
15  
16 23. Galtung J. Violence, Peace and Peace Research. *J Peace Research* 1969;**6**:167-91.  
17  
18 24. Galtung J. Cultural Violence. *J Peace Research* 1990;**27**(3):291-305.  
19  
20  
21 25. Saunders DG. Procedures for adjusting self-reports of violence for social desirability bias.  
22  
23 *J Interpersonal Violence* 1991;**6**(3):336-44.  
24  
25 26. Nilsson A. Evaluering av projektet "kränkningar i vården" (Evaluation of the project  
26  
27 "abuse in health care"). In: Swahnberg K, editor. Linköping: Division of Gender and  
28  
29 Medicine, Faculty of Health Sciences, Linköping University, 2010.  
30  
31  
32  
33  
34  
35  
36  
37  
38  
39  
40  
41  
42  
43  
44  
45  
46  
47  
48  
49  
50  
51  
52  
53  
54  
55  
56  
57  
58  
59  
60

**Table 1. Questions in NorAQ about abuse in health care.**

|                | <b>ABUSE IN HEALTH CARE</b>                                                                                                                                                                                                              |
|----------------|------------------------------------------------------------------------------------------------------------------------------------------------------------------------------------------------------------------------------------------|
| Mild abuse     | Have you ever felt offended or grossly degraded while visiting health services, felt that someone exercised blackmail against you or did not show respect for                                                                            |
| Moderate abuse | your opinion - in such a way that you were later disturbed by or suffered from the experience?                                                                                                                                           |
| Severe abuse   | Have you ever experienced that a "normal" event while visiting health services, suddenly became a really terrible and insulting experience, without you fully knowing how this could happen?                                             |
|                | Have you experienced anybody in health service purposely - as you understood - hurting you physically or mentally, grossly violating you or using your body and your subordinated position to your disadvantage for his/her own purpose? |
|                | <b>ANSWER ALTERNATIVES (THE SAME FOR ALL QUESTIONS)</b>                                                                                                                                                                                  |
|                | 1 = No, 2 = Yes, as a child (<18 years), 3 = Yes, as an adult (≥18 years), 4 = Yes, as a child and as an adult                                                                                                                           |



**Table 2. Categories and Core category answering the research question: what is abuse in health care?**

| Categories                               | Function?                        | Core category                                          |
|------------------------------------------|----------------------------------|--------------------------------------------------------|
| Abuse in health care is:                 |                                  |                                                        |
| Relative 7                               | Legitimizing AHC?                | Abuse in health care is a summoning stone in the shoe! |
| Unintentional 8                          | Legitimizing AHC?                |                                                        |
| Unacceptable:<br>you are bound to act! 8 | Protecting the patient from AHC? |                                                        |
| Ubiquitous 9                             | Protecting the patient from AHC? |                                                        |
| Dehumanising the patient 10              | Protecting the patient from AHC? |                                                        |

Note: Figures represent the number of interviews represented in each category.

## Consolidated criteria for reporting qualitative studies (COREQ): 32-item checklist

Developed from:

Tong A, Sainsbury P, Craig J. Consolidated criteria for reporting qualitative research (COREQ): a 32-item checklist for interviews and focus groups. *International Journal for Quality in Health Care*. 2007. Volume 19, Number 6: pp. 349 – 357

**YOU MUST PROVIDE A RESPONSE FOR ALL ITEMS. ENTER N/A IF NOT APPLICABLE**

| No. Item                                       | Guide questions/description                                                                                                                              | Reported on Page #                               |
|------------------------------------------------|----------------------------------------------------------------------------------------------------------------------------------------------------------|--------------------------------------------------|
| <b>Domain 1: Research team and reflexivity</b> |                                                                                                                                                          |                                                  |
| <i>Personal Characteristics</i>                |                                                                                                                                                          |                                                  |
| 1. Inter viewer/facilitator                    | Which author/s conducted the <u>inter view</u> or focus group?                                                                                           | KS and BW                                        |
| 2. Credentials                                 | What were the researcher's credentials?<br>E.g. PhD, MD                                                                                                  | PhD/PhD                                          |
| 3. Occupation                                  | What was their occupation at the time of the study?                                                                                                      | BW: Senior consultant gynaecologist<br>KS: Nurse |
| 4. Gender                                      | Was the researcher male or female?                                                                                                                       | F / F                                            |
| 5. Experience and training                     | What experience or training did the researcher have?                                                                                                     | academic training<br>professor / ass. professor  |
| <i>Relationship with participants</i>          |                                                                                                                                                          |                                                  |
| 6. Relationship established                    | Was a relationship established prior to study commencement?                                                                                              | Informal meeting                                 |
| 7. Participant knowledge of the interviewer    | What did the participants know about the researcher? e.g. personal goals, reasons for doing the research                                                 | professor's<br>results from<br>earlier research  |
| 8. Interviewer characteristics                 | What characteristics were reported about the inter viewer/facilitator? e.g. Bias, assumptions, reasons and interests in the research topic               | Engagement in the intervention is discussed      |
| <b>Domain 2: study design</b>                  |                                                                                                                                                          |                                                  |
| <i>Theoretical framework</i>                   |                                                                                                                                                          |                                                  |
| 9. Methodological orientation and Theory       | What methodological orientation was stated to underpin the study? e.g. grounded theory, discourse analysis, ethnography, phenomenology, content analysis | Grounded theory                                  |
| <i>Participant selection</i>                   |                                                                                                                                                          |                                                  |
| 10. Sampling                                   | How were participants selected? e.g. purposive, convenience, consecutive, snowball                                                                       | Convenience                                      |
| 11. Method of approach                         | How were participants approached? e.g. face-to-face, telephone, mail, email                                                                              | face to face<br>by coordinators                  |
| 12. Sample size                                | How many participants were in the study?                                                                                                                 | 10                                               |

|                                        |                                                                                                                                 |                                    |
|----------------------------------------|---------------------------------------------------------------------------------------------------------------------------------|------------------------------------|
| 13. Non-participation                  | How many people refused to participate or dropped out? Reasons?                                                                 | 11 Not eligible<br>4 refused       |
| <i>Setting</i>                         |                                                                                                                                 |                                    |
| 14. Setting of data collection         | Where was the data collected? e.g. home, clinic, workplace                                                                      | clinic                             |
| 15. Presence of non-participants       | Was anyone else present besides the participants and researchers?                                                               | NO                                 |
| 16. Description of sample              | What are the important characteristics of the sample? e.g. demographic data, date                                               | Different<br>shift categories      |
| <i>Data collection</i>                 |                                                                                                                                 |                                    |
| 17. Interview guide                    | Were questions, prompts, guides provided by the authors? Was it pilot tested?                                                   | yes<br>not app repeated interviews |
| 18. Repeat interviews                  | Were repeat inter views carried out? If yes, how many?                                                                          | 10                                 |
| 19. Audio/visual recording             | Did the research use audio or visual recording to collect the data?                                                             | AUDIO                              |
| 20. Field notes                        | Were field notes made during and/or after the inter view or focus group?                                                        | yes                                |
| 21. Duration                           | What was the duration of the inter views or focus group?                                                                        | appr. 60 min                       |
| 22. Data saturation                    | Was data saturation discussed?                                                                                                  | yes                                |
| 23. Transcripts returned               | Were transcripts returned to participants for comment and/or correction?                                                        | NO                                 |
| <b>Domain 3: analysis and findings</b> |                                                                                                                                 |                                    |
| <i>Data analysis</i>                   |                                                                                                                                 |                                    |
| 24. Number of data coders              | How many data coders coded the data?                                                                                            | one                                |
| 25. Description of the coding tree     | Did authors provide a description of the coding tree?                                                                           | no                                 |
| 26. Derivation of themes               | Were themes identified in advance or derived from the data?                                                                     | from data                          |
| 27. Software                           | What software, if applicable, was used to manage the data?                                                                      | —                                  |
| 28. Participant checking               | Did participants provide feedback on the findings?                                                                              | —                                  |
| <i>Reporting</i>                       |                                                                                                                                 |                                    |
| 29. Quotations presented               | Were participant quotations presented to illustrate the themes/findings? Was each quotation identified? e.g. participant number | yes<br>no                          |
| 30. Data and findings consistent       | Was there consistency between the data presented and the findings?                                                              | yes                                |
| 31. Clarity of major themes            | Were major themes clearly presented in the findings?                                                                            | yes                                |
| 32. Clarity of minor themes            | Is there a description of diverse cases or discussion of minor themes?                                                          | yes                                |

Once you have completed this checklist, please save a copy and upload it as part of your submission. When requested to do so as part of the upload process, please select the file type: **Checklist**. You will NOT be able to proceed with



**Staff's perception of abuse in health care: a Swedish qualitative study.**

|                                 |                                                                                                                                                                                                            |
|---------------------------------|------------------------------------------------------------------------------------------------------------------------------------------------------------------------------------------------------------|
| Journal:                        | <i>BMJ Open</i>                                                                                                                                                                                            |
| Manuscript ID:                  | bmjopen-2012-001111.R1                                                                                                                                                                                     |
| Article Type:                   | Research                                                                                                                                                                                                   |
| Date Submitted by the Author:   | 18-Jun-2012                                                                                                                                                                                                |
| Complete List of Authors:       | Swahnberg, Katarina; Division of Gender and Medicine, Department of Clinical and Experimental Medicine<br>Wijma, Barbro; Division of Gender and Medicine, Department of Clinical and Experimental Medicine |
| <b>Primary Subject Heading</b>: | Medical education and training                                                                                                                                                                             |
| Secondary Subject Heading:      | Ethics, Health services research, Medical education and training, Qualitative research                                                                                                                     |
| Keywords:                       | EDUCATION & TRAINING (see Medical Education & Training), ETHICS (see Medical Ethics), QUALITATIVE RESEARCH                                                                                                 |
|                                 |                                                                                                                                                                                                            |

SCHOLARONE™  
Manuscripts

1  
2  
3 **TITLE:** Staff's perception of abuse in health care: a Swedish qualitative study.  
4  
5  
6

7 **CORRESPONDING AUTHOR:** Katarina Swahnberg PhD, Division of Gender and  
8  
9 Medicine, Department of Clinical and Experimental Medicine, Faculty of Health Sciences,  
10  
11 Linköping University, S-581 83 Linköping, Sweden.  
12

13  
14 Email: [katarina.swahnberg@liu.se](mailto:katarina.swahnberg@liu.se)  
15

16 Phone; + 46 10-103 31 91  
17  
18  
19

20  
21 **AUTHORS:** Katarina Swahnberg, Ph.D, Associate Professor & Barbro Wijma, MD, PhD,  
22  
23 Professor.  
24

25 Division of Gender and Medicine, Department of Clinical and Experimental Medicine,  
26  
27 Faculty of Health Sciences, Linköping University, Sweden.  
28  
29  
30

31  
32 **FUNDING:** The Swedish Research Council  
33  
34  
35

36 **KEYWORDS:** abuse in health care; quality of care; ethics; qualitative method  
37  
38  
39

40  
41 **WORD COUNT:** 4594  
42  
43  
44  
45  
46  
47  
48  
49  
50  
51  
52  
53  
54  
55  
56  
57  
58  
59  
60

## ABSTRACT

**Objective:** The study aim was to apprehend staff's perception of abuse in health care (AHC) after an intervention based on 'Forum Play', and make comparisons to pre intervention interviews and interviews with male and female patients. AHC can be described as a failing encounter from the patient's perspective.

**Design:** Qualitative interview follow up study.

**Setting:** A Swedish Women's Clinic.

**Participants:** In a pre-intervention study 21 staff members were interviewed. Eligible for the follow up study were 14 informants who had participated in the intervention. Four declined participation leaving ten informants for this study.

**Intervention:** During January 2008 - January 2009, all staff members (N=136) were invited to participate in Forum Play workshops. Seventy-four participants took part in at least one of the seventeen half-day workshops.

**Primary outcome measures:** Staffs perception of AHC.

**Results:** The core category, 'a summoning stone in the shoe', was constructed of five categories: 'Dehumanising the patient', 'Unacceptable: you are bound to act!', 'Ubiquitous', 'Unintentional' and 'Relative'.

Forum Play had demonstrated possibilities to act even in seemingly "impossible" situations, and that the taboo status of AHC was altered at the clinic.

When our results were compared to those in the pre-intervention study, we found an *increased* awareness about AHC, *more* concrete examples of AHC, a *stronger* empathy for patients, and *fewer* explanations, justifications and trivialisations of AHC.

**Conclusion:** In this follow-up study staff's perception of AHC was closer to the patient's perspective. Compared to the pre intervention interviews staff showed a greater willingness not only to acknowledge AHC, but also to take on a responsibility to act in order to stop or

1  
2  
3  
4  
5  
6  
7  
8  
9  
10  
11  
12  
13  
14  
15  
16  
17  
18  
19  
20  
21  
22  
23  
24  
25  
26  
27  
28  
29  
30  
31  
32  
33  
34  
35  
36  
37  
38  
39  
40  
41  
42  
43  
44  
45  
46  
47  
48  
49  
50  
51  
52  
53  
54  
55  
56  
57  
58  
59  
60

prevent AHC. Explanations for this stance could be that Forum Play had showed staff that there were possibilities to act, and that the taboo status of AHC had been broken at the clinic.

For peer review only

## INTRODUCTION

Negative encounters in health care has been described as medical errors [1], communication failures or medical mishaps [2], patient dissatisfaction [3], sexual misconduct [4] etc.

Many of these negative encounters have to be investigated but what if there was no medical error or misconduct committed but the patient still felt abused?

Abuse in health care (AHC) covers a phenomenon different from e.g. medical errors and patient satisfaction even if there might be overlapping cases. [5]

AHC has been investigated in the Nordic countries. It is a rather new concept that has been operationalized in The NorVold Abuse Questionnaire (NorAQ) (Table 1). [6-10] Based on NorAQ the prevalence in female gynaecology patients in the Nordic countries ranged between 13-28 per cent. [11] AHC is prevalent in Sweden; 14-20 per cent in female and 8 per cent in male clinical and population based samples have had such experiences. [8, 12-14]

When we asked Swedish patients in qualitative interviews what AHC meant to them, both female and male patients expressed feelings of being disempowered and devalued. The core category in the female sample was a feeling of being “nullified” and in the male sample “mentally pinioned”. [15, 16] However, when staff was asked the same question (in the pre intervention study), the answers were quite different. They explained theoretically what AHC could be, e.g. transgression of ethical principles, but they were also occupied with explanations and justifications as to why AHC occurred, and the core category was “ethical lapses”. In accordance with their ambiguity and inability to handle AHC, it was treated with silence and as a taboo. [17] Moreover, staff’s awareness of AHC was dependent on their possibilities to act; low awareness was seen when there were few possibilities to act. [18]

High prevalence of AHC, creating long-lasting suffering among patients and little awareness about the problem among staff forced us to design and test an intervention against AHC. The



1  
2  
3 intervention was based on theories from ethics, sociology, cognitive theories and pedagogy  
4  
5 [19-24].  
6  
7  
8  
9

10 The interviews with staff mentioned above serves as a starting point in the present study that  
11  
12 was conducted after workshops based on Forum play where the same group of staff could  
13  
14 participate.  
15

16  
17 There is a long tradition of interventions that addresses the interpersonal component of quality  
18  
19 of care. [25] Role play is one technique used for this purpose. [26, 27] What makes this study  
20  
21 different is our focus on AHC. Augusto Boal, a Brazilian theatre director and pedagogue,  
22  
23 developed many different theatre techniques to liberate people, and Theatre of the Oppressed  
24  
25 (TO) is a characterising name used for all his techniques. Influenced by Paulo Freire's  
26  
27 *Pedagogy of the Oppressed*, TO became a grassroots movement from the nineteen sixties and  
28  
29 on, offering techniques based on empowerment to equip people to transform the conditions in  
30  
31 which they were living. [19, 28] Although TO is used worldwide to promote change  
32  
33 evaluations of success rates are scarce. [29]  
34  
35

36  
37 The essence of Forum Play is to create a safe place in a group session, to make the moral  
38  
39 conflict clear, to allow feelings but focus on action, and to practice new alternatives to act.  
40  
41 Discovering and acting out many different solutions to a situation that at first seemed  
42  
43 impossible to solve, instils hope in Forum Players. In this intervention, Forum Players are  
44  
45 assumed to gradually feel brave enough to transfer their experiences into real life, and try out  
46  
47 alternative ways at their work-place to handle or prevent AHC.  
48

49  
50 For this study we returned to the pre-intervention informants (staff) with the same research  
51  
52 question, "What is AHC?" after an intervention against AHC based on Forum Play.  
53  
54  
55  
56  
57  
58  
59  
60

1  
2  
3 The study aim was to apprehend staff's perception of AHC after an intervention based on  
4  
5 'Forum Play', and make comparisons to pre intervention interviews and interviews with male  
6  
7 and female patients.  
8  
9  
10  
11  
12  
13  
14  
15  
16  
17  
18  
19  
20  
21  
22  
23  
24  
25  
26  
27  
28  
29  
30  
31  
32  
33  
34  
35  
36  
37  
38  
39  
40  
41  
42  
43  
44  
45  
46  
47  
48  
49  
50  
51  
52  
53  
54  
55  
56  
57  
58  
59  
60

For peer review only

## METHODS

### Procedure and material

During the period January 2008 - January 2009, all staff members at the study clinic, a women's clinic at a county hospital in the south of Sweden (N=136), were invited to participate in Forum Play workshops led by professional Forum Play leaders. [30, 31] All workshops were announced at the local hospital Intranet where staff could also register. Participation was voluntary and there was no limit to the number of workshops a staff member could participate in. Seventy-four participants took part in at least one of the seventeen half-day workshops that were held (74/136=54%).

During the workshops, staff re-enacted (role-played) situations that they had experienced or heard of when patients had felt abused in health care. The situation typically included a bystander who was not intervening but felt that he or she ought to do something, but did not act, as the situation seemed to be without possible "solutions". The scene was repeated until it was clear to everyone what the moral conflict was, and who was suffering the moral conflict. [19] Then the scene was played again and the audience was encouraged to intervene. They could enter the scene and try to change the outcome by taking on the role of the person who suffered the moral conflict.

In a baseline study, we interviewed 21 staff members who were eligible for participating in the Forum Play intervention, and who represented four different staff categories. [17, 18] Eligible for the present study were those 14 informants from the original sample who had participated in the intervention (three staff members had left the clinic, and four had not participated in the intervention). Four declined participation (one gynaecologist and three auxiliaries). All interviews were booked by a coordinator employed at the clinic.

1  
2  
3 The two authors conducted ten individual semi-structured interviews: two female and one  
4  
5 male gynaecologist, one female administrator, four female midwives and two female  
6  
7 auxiliaries. Individual interviews were preferred due to the sensitive nature of the topic that  
8  
9 might evoke feelings of guilt and shame.

10  
11 The analysis presented in this study is based on answers to open-ended questions similar to  
12  
13 those in the pre-intervention study. The main question used for comparing results was: “When  
14  
15 I say abuse in health care, what is the first thing that comes to your mind?” Interviews lasted  
16  
17 on average 60 minutes. All interviews were tape-recorded and transcribed verbatim by a  
18  
19 secretary.

20  
21  
22 Written informed consent was obtained from all participants before the interview. Our request  
23  
24 to conduct the study had been approved by the regional ethical review board (Registration  
25  
26 number 194-06).  
27  
28  
29  
30

### 31 32 **Analysis**

33  
34 We choose a qualitative approach to collect and analyse data according to Barney Glaser but  
35  
36 were also inspired by later work of Janice Morse and Kathy Chamaz. [32-35] Constant  
37  
38 comparative analysis was used to process data [33]. The transcribed interviews were analysed  
39  
40 line by line according to Glaser’s scheme of open coding to generate substantive codes, i.e.,  
41  
42 words or sentences with a relationship to the research question. [32, 33] The substantive codes  
43  
44 were constantly compared between interviews to generate new substantive codes and  
45  
46 categories. Finally, the relationship between the categories was analysed and a core category  
47  
48 that answered our research question was identified. [32] No new substantive codes emerged  
49  
50 after the fourth interview. All interviews were analysed to stabilise the categories and reach  
51  
52 saturation. In order to balance individual biases the transcripts were read and analyzed by both  
53  
54 authors, a physician and a nurse with different amount of experiences in research and clinical  
55  
56  
57  
58  
59  
60

1  
2  
3  
4  
5  
6  
7  
8  
9  
10  
11  
12  
13  
14  
15  
16  
17  
18  
19  
20  
21  
22  
23  
24  
25  
26  
27  
28  
29  
30  
31  
32  
33  
34  
35  
36  
37  
38  
39  
40  
41  
42  
43  
44  
45  
46  
47  
48  
49  
50  
51  
52  
53  
54  
55  
56  
57  
58  
59  
60

work. The authors reached agreement on their coding through discussion. All categories are described in the result section and presented in Table 2.

For peer review only

## RESULTS

The core category, 'a summoning stone in the shoe', was constructed of five categories: 'Dehumanising the patient', 'Unacceptable: you are bound to act!', 'Ubiquitous', 'Unintentional' and 'Relative'. Each category is described separately below. The interaction between the categories are described under the headline "core category" at the end of the result section.

### Dehumanising the patient

This category was built on three substantive codes:

1. *"Not finding out where the patient is"*

According to the informants, AHC could signify several things:

Not to imagine what the patient is going through:

*"You have to **imagine**, and **understand** the things you say; what **are** the consequences...what do you **do** and what will be the consequences. How will it be in **this** situation? For sometimes an act can **be** rather innocent, and in some situations, [certain] behaviour can be completely **catastrophic**."*

To belittle a patient's problem by comparing with other patient's problems:

*"Yes, to listen to what the other is talking about...to be focused on the one in front of you. Yes, seriously, even [when you] think that's a silly little thing compared to the death [a dying person]...in the next room."*

1  
2  
3 To be judgmental:

4  
5 *“If someone is admitted, there are not so many of them here but, gipsies...Have you locked*  
6  
7 *away your handbag? Where is my purse? They are judged awfully hard.”*  
8  
9

10  
11  
12 Lack of cultural awareness:

13  
14 Expecting that patients with a foreign background live by and accept Swedish norms like in  
15  
16 the following example might also render in AHC, according to one informant who had had to  
17  
18 console a crying patient after an examination.  
19

20  
21 *“When she came it was a shock for her [that it was a male gynaecologist] and she told them*  
22  
23 *that...she was going to see a female [gynaecologist] and then they had answered her that well*  
24  
25 *but you can't always get...what you ask for...if you seek help at such short notice then you*  
26  
27 *have to take what you can get. Everything was supposed to be quick and she just felt that she*  
28  
29 *was just...trouble for them... And she was...so sad afterwards.”*  
30  
31

32  
33  
34 2. *“Saying things that are very abusive”*  
35

36 According to the informants, AHC can be something you say or the way you say it; a few  
37  
38 words may turn a situation into a disaster for a patient.  
39

40  
41 One example: a patient with cancer was constantly throwing up. Staff had provided her with  
42  
43 bags and bowls but nothing helped, repeatedly there was vomit everywhere: on the bedside  
44  
45 table, in the bed and all over her things. Staff thought that she was capable of using the bags  
46  
47 and bowls, and discussed between them if she did it on purpose. There were sighs among the  
48  
49 staff, sometimes even audible to the patient, according to the informant. One day, a staff  
50  
51 member asked the patient if she was going to continue like this when she would go home.  
52

53  
54 Another informant remembered her own first delivery: the baby's heart sounds were getting  
55  
56 worse, the suction cup did not work, she had intravenous fluids running in both arms, and she  
57  
58  
59  
60

1  
2  
3 was screaming in pain. Then the doctor came up to her and said, “Are we going to cooperate  
4 for hell’s sake!” Afterwards she felt abused and despite her longing for another child it took  
5 years before she decided to have a second baby.  
6  
7

8  
9 Informants said that they used to think that AHC had to be a major thing, but that they now  
10 realised that AHC was often an unexpectedly small thing, and that a good situation could turn  
11 into a disaster because of a small thing. As mentioned above, the sex of the examiner might  
12 sometimes be crucial for the patient for religious or other reasons, while some staff members  
13 may consider it a small thing.  
14  
15  
16  
17  
18  
19

### 20 21 22 23 3. “They must have felt very vulnerable”

24 An informant told us about a patient that she had known for a long time whom she thought of  
25 as extremely nervous and inadequate. The patient had told her that she was afraid of hospitals.  
26  
27 Later she also told her that she had been forced to go through a gynaecological examination  
28 when she was a child, on suspicion that she had been sexually abused by or involved with an  
29 older boy.  
30  
31

32  
33  
34  
35  
36 “... she [the mother] only said, ‘now we are going to town’. And then they brought her to the  
37 gynaecological ward and then they **held her tightly** and she was examined. And she **screamed**  
38 and she **kicked** and she was **struggling** with them. And she said that she can’t forget this ...it  
39 is stuck with her that...that they pushed her down and **forced** her, and so on. So I think that’s  
40 a typical example of abuse in the health care and for **ten** years I’ve been wondering what’s  
41 wrong with this girl.”  
42  
43  
44  
45  
46  
47  
48

49 Power and power imbalance in relation to AHC was mentioned in several ways, e.g., the  
50 exposed position a woman has during a gynaecological examination or the patients’  
51 dependency on staff’s willingness to help and to be gentle to them: “You are not your own  
52 master then.”  
53  
54  
55  
56  
57  
58  
59  
60



1  
2  
3 One informant was also pondering about her ability to really understand what it meant to be  
4  
5 dependent and exposed as a patient:  
6

7 *"...I still think that I can feel...that you can imagine...the dependency...get an understanding*  
8  
9 *about how it is...I can never understand, but I can feel humble...I can share it...I can have*  
10  
11 *respect and understand that she has something else with her that I haven't got."*  
12

13  
14 AHC could also mean that advantage is taken of the power inherent of one's position,  
15  
16 symbolised by, e.g., the uniforms: *"...when you put on your work clothes, then you have a*  
17  
18 *kind of...how to say it, a power position."*  
19

### 20 21 22 23 **Unacceptable: you are bound to act!**

24  
25 The informants were prone to positioning themselves against AHC by, e.g., talking about how  
26  
27 they had (re)acted against AHC, and that it could be done in a good way, *"...but then I think*  
28  
29 *you have an obligation... to rebuke. In a loving way."* They also emphasised that the  
30  
31 bystander had a very important role in noticing and stopping or preventing AHC, *"because*  
32  
33 *sometimes I think that it is the person who stands by...maybe more often senses when*  
34  
35 *something goes wrong than the person who is [active] in the situation"*.  
36  
37

38 There were different strategies for intervening against potentially abusive situations:

39  
40 One informant was concerned about open doors and meant that staff leaving doors open  
41  
42 jeopardised a patient's integrity. She was struggling with this problem:

43  
44 *"...it is an indication that you probably can't miss [with laughter in her voice]. No, but*  
45  
46 *sometimes when you have been sitting in the auxiliaries' expedition, there is just a sliding*  
47  
48 *door...there are patients sitting right outside and then I close the door...or when*  
49  
50 *you...hear...that they...are in a room talking and so on. Close the doors...and I close that*  
51  
52 *door [the sliding door] and then it's open again! And I close it."*  
53  
54

55  
56 Practical arrangements for preventing AHC were discussed:  
57  
58  
59  
60

1  
2  
3 *"...there are more discussions about this [now]. About...for example, open the door into a*  
4 *room where a patient is and...how to **place** patients in a room, and how many really have to*  
5 *come into a room. So, these kinds of questions."*  
6  
7  
8

9  
10 It was also put forward that small talks over a cup of coffee could raise awareness about AHC  
11 among staff, but to talk to the patient, either before or after AHC had occurred, was seldom  
12 mentioned as an intervention. One informant interpreted this particular kind of silence as fear:  
13

14 *"It must be some kind of ...fear to...realise that you are not perfect. Maybe!...Of course if you*  
15 *ask then you have to be prepared...to do something about what the patient might bring up."*  
16  
17  
18

19  
20 In other words, asking a patient about AHC might force staff to take action, e.g., towards a  
21 colleague. Some informants stressed the importance of being earnest in such situations and  
22 talk directly to the staff involved as soon as possible. This was what the informant did who  
23 told us about the patient who expected to be examined by a female gynaecologist. When she  
24 had comforted the patient she asked her if she could talk to the staff member who had  
25 examined her, and if the patient wanted to participate in such a meeting. The patient declined t  
26  
27 *"...I was allowed to tell...how she had experienced it...I was so disturbed by what she told*  
28 *me. So I felt that I had to find out if that was how it had happened. But he had not really*  
29 *experienced it that way..."*  
30  
31  
32  
33  
34  
35  
36  
37  
38  
39

40 Furthermore, there was a possibility to report upwards in the hierarchy: *"I would not hesitate*  
41 *to...contact...[silence] a foreman, my bosses [if a patient was abused]."* And there was a  
42 consensus on having an open climate at the clinic, and that it was important to be made aware  
43 when a patient was abused. Speaking up against AHC was considered an option for most  
44 informants:  
45  
46  
47  
48  
49

50 *"That you say, 'you can't behave like that'. So I believe that...people would tell you...I*  
51 *believe that there are few who would not dare to speak up...I believe they would speak to a*  
52 *colleague."*  
53  
54  
55  
56  
57  
58  
59  
60

### Ubiquitous

AHC was often described in a broad sense as something that can happen to anyone at any age: patients, staff, relatives and friends to the patient. Anybody can become a victim or an agent (actor or bystander) of AHC: “...we are abusing each other...all the way down to the patient...”

AHC was also interpreted as staff being abusive against other staff, for instance by making remarks in a harsh way. It was also pointed out that a patient who had witnessed staff treating each other badly might feel hesitant to ask even important questions for their own sake.

One abusive situation between members of staff described as common was when a midwife called for a doctor and that doctor called for another doctor, and the two of them did not involve the midwife when they discussed the patient.

It was also hypothesised that staff experiencing abuse from other staff might subconsciously take it out on someone else: “...if I am abused then I will look for someone...that...I have power over.” And that someone is likely to be a patient: “...it is easier to abuse when there is some kind of power relation... and when there is a kind of malady between us.”

However, patients abused by staff were considered the most serious kind of AHC: “...the most serious is if we, the staff...abuse patients or relatives. That is another situation I believe.”

Informants also agreed that patients were the most common victims of AHC, and that if patients abused staff it should be understood differently: “Because there might be...patients who abuse staff in many ways, so to say. But on the other hand, they are in another position...worry can turn you...rather nasty, really.”

## Unintentional

AHC was believed to be a common experience among patients. Most informants said that AHC was usually unintentional on behalf of the staff, and that often involved staff was not even aware that it had happened. *“...they are not aware, surely. But then I have to...become aware of how people might experience what I do.”*

A variety of explanations of the occurrence of AHC were brought forward, and it was pointed out several times that AHC did not come from evilness in staff members, but rather from a lack of consideration and empathy.

Not being reflective could result in a routine manner or performance. One example given was that of an authority, like the gynaecologist who was often believed to be under time restraints, who simply follows an old habit: focusing on getting things done instead of on the patient. *“...it’s so easy to follow... the same footsteps all the time...”*

Another example of unintentional AHC was when staff members made jokes between themselves about, e.g., someone being fat, and other staff members were laughing without reflecting on what they were laughing at, or if they ought to put an end to it.

It was also brought forward that unawareness of AHC could be due to inadequate communication skills, e.g., if staff was not sensible enough to read the patient’s body language.

The uniqueness in each and everyone’s characters was appreciated, but sometimes, if a colleague was known to be harsh without meaning it or even noticing it her- or himself, there was a moral conflict. A bystanding staff member would in such a situation understand that the patient might feel abused, and at the same time know that the “harsh” staff member did not mean to abuse the patient. This was considered a difficult situation, but as one informant concluded,

1  
2  
3 “...it’s about personality, too, so it’s really difficult to know how to tackle it. It’s interesting  
4 that people are different, but on the other hand you don’t want those differences to befall the  
5 patients so that they feel abused, or maltreated.”  
6  
7  
8  
9

### 10 11 **Relative**

12  
13 The informants were provoked by the word “abuse” in AHC, and prone to take a defending  
14 position against it. They thought of “abuse” (kränkning in Swedish) as a very strong word,  
15 that was sometimes used too often and in an inappropriate way. The informants thought that,  
16 especially in the rest of the society (outside the hospital), the word “abuse” had suffered  
17 inflation. “I think that ‘abuse’ may be a tough word...It’s a worn out word or a word that is  
18 used incorrectly...”  
19  
20  
21  
22  
23  
24  
25  
26

27 Informants agreed that AHC was a difficult concept to define. On the one hand, AHC was  
28 considered a strong word, and yet AHC could be a small thing. “...there is no such...scientific  
29 quantitative concept [saying] that this is abuse.”  
30  
31  
32  
33

34 The wording seemed important to the informants and a more neutral word for AHC was  
35 desired by some of the informants, e.g., (negative) encounters (bemötande in Swedish).  
36 AHC was considered a personal experience, and it was expressed that patients were more or  
37 less vulnerable to this experience. It was also brought forward that there were reasonable  
38 experiences that made some patients more vulnerable to AHC than others, e.g., through a  
39 history of abuse.  
40  
41  
42  
43  
44  
45  
46  
47  
48

### 49 **Core category**

50  
51 The three categories ‘Dehumanising the patient’, ‘unacceptable: you are bound to act!’ and  
52 ‘ubiquitous’ are strongly linked to each other in many ways, not the least because of their  
53 potentially patient protective components. The category ‘Dehumanising the patient’ implies  
54  
55  
56  
57  
58  
59  
60

1  
2  
3 not being seen as a human being, stripped of human value. The codes that filled out this  
4  
5 category were characterised by moral imagination and respect for the patient's situation. The  
6  
7 informants showed great insight into patients' vulnerability and their own responsibility in  
8  
9 relation to AHC. The fact that the informants gave several detailed examples of AHC  
10  
11 underlined their emotional engagement. This engagement was a strong reason for staff to  
12  
13 adopt a clear position against AHC, expressed in the category 'unacceptable: you are bound to  
14  
15 act!' It was also made clear that acting against AHC was beneficial not only for the patient but  
16  
17 also for staff: "...that's what we really ought to do [talk to each other when we think a patient  
18  
19 might feel abused]...we take responsibility for each other that way."

20  
21  
22 The category 'ubiquitous', indicated that the informants were now more prone to recognise  
23  
24 AHC. This openness could be seen as a mediator that enabled staff to talk about AHC, which  
25  
26 probably contributed to a milieu where staff felt some pressure to also act against AHC.  
27  
28 However, there were contradictions in the staff's definitions of AHC. To claim that AHC was  
29  
30 'unintentional' was a way to describe a fact, and at the same time make AHC trivial.  
31  
32 Likewise, the discussion that rendered a 'relative' definition of AHC could be seen as a  
33  
34 diversion from a topic that provoked awkward feelings. Both of these categories could be  
35  
36 used to legitimize AHC.  
37  
38  
39  
40  
41  
42  
43  
44  
45  
46  
47  
48  
49  
50  
51  
52  
53  
54  
55  
56  
57  
58  
59  
60

## DISCUSSION

This study focuses staff members' perception towards AHC after an intervention based on Forum Play.

### Comparing interviews from before and after the intervention

In our pre-intervention studies, staff reported detached perceptions of AHC and AHC had a taboo status at the study clinic. [17, 18] They recognised AHC as 'transgressions of ethical principles' but stated that these actions were often justifiable from a staff perspective for various reasons. [17] Staff's awareness of AHC also turned out to be a complex phenomenon restricted by their possibilities to act e.g., caused by hierarchies or because they did not know what to do since they had no tools or training in handling AHC. [18] The strongest expressions of change in the present study, when compared to the pre-intervention studies, was the *increased* awareness about AHC, *stronger* empathy for patients displayed in *more* concrete examples of, and *fewer* explanations, justifications and trivialisations of AHC. The increase of concrete examples of AHC that staff had seen or heard of was most likely a manifestation of the increased awareness of AHC among staff [18].

Moreover, the answers to the question, "what is AHC?" in the present study, are closer to the experiences of both female and male patients than those of the study that posed the same question to staff prior to the intervention, where the core category was 'ethical lapses'. [15-17] Apparently, staff's perception of AHC were closer to the patient's perspective.

### **The core category**

Despite the “resistance” we found, the overall finding is that AHC summons responsibility and urges an itch to act among staff. From having been considered a matter of mishaps - “ethical lapses” - AHC had become “a summoning stone in the shoe” [17]. By this is meant that acting against AHC had become an imperative.

The imperative to act against AHC in the present study stands out as the most important finding. The possible mechanisms for this finding could be that, 1. Forum Play had showed staff that there were possibilities to act, and 2) the taboo status of AHC had been broken at the clinic. The informants told us that AHC was present more often in their daily conversations, and it was even discussed during coffee breaks, i.e. AHC had become a shared problem. According to Galtung, direct events of violence are nurtured and legitimised by cultural and structural violence, forming a vicious triangle. [20, 23] While events of direct violence often are visible, cultural and structural violence are often not. A taboo can exemplify cultural violence. Breaking the taboo could be seen as a way to delegitimize direct events of AHC, and Forum play may have been a useful tool for this purpose since the “culture” had changed, and talking about and acting against AHC had become “the right thing to do”. However, it cannot be ruled out that any intervention against AHC that merely drew attention to the topic would have been useful. Therefore it would be interesting to compare different strategies to counteract AHC in future studies.

### **From disavowal to responsibility**

The resistance against and disavowal of AHC found in the pre-intervention studies had not only decreased, it had also changed character. [17, 18] For example, before the intervention informants strongly emphasized that they were abused too. Now they had attained a more general and less defensive view; anybody could get involved in AHC as an actor or a victim.



1  
2  
3 Moreover, it was considered much worse if a patient was abused by staff, because staff had  
4 more powerful positions than patients and they were entrusted with the patients' vulnerability.  
5  
6  
7 AHC was still considered to be acted out unintentionally, but the argument was no longer  
8  
9  
10 used to explain or justify AHC. Instead it was used as an incentive to become more aware  
11  
12 about AHC.

13  
14 How to define AHC was still problematic to the informants. Obviously AHC had been a new  
15  
16 terminology for them, but the wish to rename AHC into a more "comfortable" concept is  
17  
18 interesting. It is likely that the concept AHC gradually will be exchanged for the more neutral  
19  
20 "a failing encounter" at this clinic.  
21  
22  
23

### 24 25 **Limitations**

26  
27 One of the study limitations is that it is based on few interviews; only ten out of 21 informants  
28  
29 took part in the follow up study. In spite of this drawback we could establish that no new  
30  
31 substantive codes emerged after the fourth interview. Early saturation indicates that there  
32  
33 were more similarities than differences in staff's experiences of AHC. Six more interviews  
34  
35 were conducted to fill up categories and assure saturation, but it cannot be ruled out that yet  
36  
37 another interview could have added new information.  
38  
39

40 To conduct qualitative **follow-up interviews** gave us a deeper understanding of changes that  
41  
42 might have been pointed out but not have been thoroughly explained by means of e.g.  
43  
44 repeated quantitative measures. On the other hand, the approach also involves risks, e.g. the  
45  
46 authors' involvement in the project could be assumed to increase the risk for bias both on  
47  
48 behalf of the researchers, i.e. doing interpretations favourable to the project's success rate, as  
49  
50 well as on behalf of the informants, i.e., a social desirability bias. [36] In an effort to  
51  
52 counteract these biases, external independent researchers repeated interviews as well as  
53  
54 analyses. An external researcher analysed de novo the interviews in the present study. This  
55  
56  
57  
58  
59  
60

1  
2  
3 analysis also showed that staff's perception of AHC had approached the patient perspective  
4  
5 [37]. New interviews were conducted by a consultant who was not involved in the project and  
6  
7 with a different sample of staff who had also participated in the intervention. The results  
8  
9 described a positive change from before till after the intervention, not only in perception but  
10  
11 also in actions. Several examples were given where staff members had been "experimenting"  
12  
13 with different ways to prevent or handle AHC, also where it meant confronting a colleague.  
14  
15  
16 [38]  
17  
18  
19

## 20 21 CONCLUSION

22  
23  
24  
25 In this follow-up study staff's perception of AHC were closer to the patient's perspective.  
26  
27 Compared to the pre intervention interviews staff showed a greater willingness not only to  
28  
29 acknowledge AHC, but also to take on a responsibility to act in order to stop or prevent AHC.  
30  
31 Explanations for this stance could be that Forum Play had showed staff that there were  
32  
33 possibilities to act, and that the taboo status of AHC had been broken at the clinic.  
34  
35  
36  
37  
38  
39  
40  
41  
42  
43  
44  
45  
46  
47  
48  
49  
50  
51  
52  
53  
54  
55  
56  
57  
58  
59  
60

## REFERENCES

1. McFadden KL, Stock GN, Gowen CR, 3rd. Exploring strategies for reducing hospital errors. *J Healthc Manag* 2006;**51**(2):123-35; discussion 36.
2. Sutcliffe KM, Lewton E, Rosenthal MM. Communication failures: An insidious contributor to medical mishaps. *Acad Med* 2004;**79**(2):186-94.
3. Coyle J, Williams B. Seeing the wood for the trees: defining the forgotten concept of patient dissatisfaction in the light of patient satisfaction research. *Int J Health Care Qual Assur Inc Leadersh Health Serv* 1999;**12**(6-7):i-ix.
4. Lamont JA, Woodward C. Patient-physician sexual involvement: a Canadian survey of obstetrician-gynecologists. *Can Med Assoc J* 1994;**150**(9):1433-9.
5. Bruggemann AJ, Wijma B, Swahnberg K. Abuse in health care: a concept analysis. *Scand J Caring Sci* 2012;**26**(1):123-32.
6. Wijma B, Schei B, Swahnberg K. NorAQ. The NorVold Abuse Questionnaire. Linköping: Division of Gender and Medicine, Faculty of Health Sciences, Linköping University, 2004.
7. Wijma B, Schei B, Swahnberg K et al. Emotional, physical, and sexual abuse in patients visiting gynaecology clinics: a Nordic cross-sectional study. *Lancet* 2003;**361**(9375):2107-13.
8. Swahnberg K. Prevalence of gender violence. Studies of four kinds of abuse in five Nordic countries [Doctoral Thesis]. Faculty of Health Sciences, Linköping University, 2003.
9. Swahnberg K. NorVold Abuse Questionnaire for men (m-NorAQ): validation of new measures of emotional, physical, and sexual abuse and abuse in health care in male patients. *Gend Med* 2011;**8**(2):69-79.

- 1  
2  
3 10. Swahnberg K, Wijma B. The NorVold Abuse Questionnaire (NorAQ): Validation of new  
4  
5 measures of emotional, physical, and sexual abuse, and abuse in the health care system  
6  
7 among women. *Eur J Public Health* 2003;**13**(4):361-6.  
8
- 9  
10 11. Swahnberg K, Schei B, Hilden M et al. Patients' experiences of abuse in health care: a  
11  
12 Nordic study on prevalence and associated factors in gynecological patients. *Acta*  
13  
14 *Obstet Gynecol Scand* 2007;**86**(3):349-56.  
15
- 16 12. Swahnberg K, Davidsson J, Hearn J et al. Men's experiences of emotional, physical and  
17  
18 sexual abuse, and abuse in health care: A cross-sectional study of a Swedish random  
19  
20 male population sample. *Scand J Public Health. In press* 2011.  
21
- 22 13. Swahnberg K, Hearn J, Wijma B. Prevalence of perceived experiences of emotional,  
23  
24 physical, sexual, and health care abuse in a Swedish male patient sample. *Violence*  
25  
26 *and Victims* 2009;**24**(2):275-86.  
27
- 28 14. Swahnberg K, Wijma B, Schei B et al. Are sociodemographic and regional and sample  
29  
30 factors associated with prevalence of abuse? *Acta Obstet Gynecol Scand*  
31  
32 2004;**83**(3):276-88.  
33
- 34 15. Swahnberg K, Thapar-Bjorkert S, Bertero C. Nullified: women's perceptions of being  
35  
36 abused in health care. *J Psychosom Obstet Gynaecol* 2007;**28**(3):161-7.  
37
- 38 16. Swahnberg K, Wijma B, Hearn J et al. Mentally pinioned: Men's perceptions of being  
39  
40 abused in health care. *Int J Mens Health* 2009;**8**(1):60-71.  
41
- 42 17. Swahnberg K, Zbikowski A, Wijma B. Ethical lapses: staff's perception of abuse in health  
43  
44 care. *J Psychosom Obstet Gynaecol* 2010;**31**(3):123-9.  
45
- 46 18. Swahnberg K, Wijma B. Staff's awareness of abuse in health care varies according to  
47  
48 context and possibilities to act. *J Psychosom Obstet Gynaecol* 2011;**32**(2):65-71.  
49
- 50 19. Boal A. *Games for actors and non-actors*. London/New York: Routledge, 1992.  
51
- 52 20. Galtung J. Violence, Peace and Peace Research. *J Peace Research* 1969;**6**:167-91.  
53  
54  
55  
56  
57  
58  
59  
60

- 1  
2  
3 21. Glover J. *Humanity. A moral history of the twentieth century*. London: Pimlico, 2001.  
4  
5 22. Zimbardo P. *The Lucifer effect. Understanding how good people turn evil*. New York:  
6  
7 Random House, Inc, 2008.  
8  
9 23. Galtung J. Cultural Violence. *J Peace Research* 1990;**27**(3):291-305.  
10  
11 24. Beck J. *Cognitive therapy: basics and beyond*. New York: The Guilford Press, 1995.  
12  
13 25. Fonn S, Mtonga AS, Nkoloma HC et al. Health providers' opinions on provider-client  
14 relations: results of a multi-country study to test Health Workers for Change. *Health*  
15 *Policy Plan* 2001;**16 Suppl 1**:19-23.  
16  
17 26. Fonn S, Xaba M. Health Workers for Change: developing the initiative. *Health Policy*  
18 *Plan* 2001;**16 Suppl 1**:13-8.  
19  
20 27. Ammentorp J, Kofoed P-E. Being a patient in your own department. *Patient Educ Couns*  
21 2010;**81**:142-3.  
22  
23 28. Freire P. *Pedagogy of the Oppressed - Divide and Oppress*. Casa De Las Americas  
24 1986(159):148-51.  
25  
26 29. Österlind E. Acting out of habits – can Theatre of the Oppressed promote change? Boal's  
27 theatre methods in relation to Bourdieu's concept of habitus. *Research in Drama*  
28 *Education: The Journal of Applied Theatre and Performance* 2008;**13**(1):71-82.  
29  
30 30. Stocker SS. *Staging the Moral Imagination in the Health Care Setting*. Linköping:  
31 Division of Gender and Medicine, Faculty of Health Sciences, Linköping University,  
32 2011.  
33  
34 31. Josephson A. *Praktisk kunskap i att förhindra kränkningar. Rapport om dramapedagogiskt*  
35 *arbete med vårdpersonal (Practical knowledge in counteracting abuse in health care.*  
36 *Report on drama pedagogic work among health care staff)*. Linköping: Division of  
37 Gender and Medicine, Faculty of Health Sciences, Linköping University, 2011.  
38  
39 32. Glaser B. *Theoretical sensitivity*. 4 ed. Mill Valley, CA: Sociology Press, 1978.  
40  
41  
42  
43  
44  
45  
46  
47  
48  
49  
50  
51  
52  
53  
54  
55  
56  
57  
58  
59  
60

- 1  
2  
3 33. Glaser B. *Basics of grounded theory analysis. Emergence versus forcing*. Mill Valley,  
4  
5 CA: Sociology Press, 1992.  
6  
7 34. Morse JM, editor. *Developing grounded theory. The second generaton*. Walnut Creek:  
8  
9 Left coast press, INC, 2009.  
10  
11 35. Charmaz K. *Constructing Grounded Theory. A practical guide through qualitative*  
12  
13 *analysis*. London: SAGE Publications Ltd, 2009.  
14  
15  
16 36. Saunders DG. Procedures for adjusting self-reports of violence for social desirability bias.  
17  
18 *J Interpersonal Violence* 1991;6(3):336-44.  
19  
20 37. Swahnberg K, Berterö C. Minimizing human dignity: staff's perception of abuse in health  
21  
22 care. *Accepted* 2012.  
23  
24  
25 38. Nilsson A. Evaluering av projektet "kränkningar i vården" (Evaluation of the project  
26  
27 "abuse in health care"). In: Swahnberg K, editor. Linköping: Division of Gender and  
28  
29 Medicine, Faculty of Health Sciences, Linköping University, 2010.  
30  
31  
32  
33  
34  
35  
36  
37  
38  
39  
40  
41  
42  
43  
44  
45  
46  
47  
48  
49  
50  
51  
52  
53  
54  
55  
56  
57  
58  
59  
60

**Table 1. Questions in NorAQ about abuse in health care.**

|                | <b>ABUSE IN HEALTH CARE</b>                                                                                                                                                                                                              |
|----------------|------------------------------------------------------------------------------------------------------------------------------------------------------------------------------------------------------------------------------------------|
| Mild abuse     | Have you ever felt offended or grossly degraded while visiting health services, felt that someone exercised blackmail against you or did not show respect for                                                                            |
| Moderate abuse | your opinion - in such a way that you were later disturbed by or suffered from the experience?                                                                                                                                           |
| Severe abuse   | Have you ever experienced that a "normal" event while visiting health services, suddenly became a really terrible and insulting experience, without you fully knowing how this could happen?                                             |
|                | Have you experienced anybody in health service purposely - as you understood - hurting you physically or mentally, grossly violating you or using your body and your subordinated position to your disadvantage for his/her own purpose? |
|                | <b>ANSWER ALTERNATIVES (THE SAME FOR ALL QUESTIONS)</b>                                                                                                                                                                                  |
|                | 1 = No, 2 = Yes, as a child (<18 years), 3 = Yes, as an adult (≥18 years), 4 = Yes, as a child and as an adult                                                                                                                           |

**Table 2. Categories and Core category answering the research question: what is abuse in health care?**

| Categories                               | Function?                        | Core category                                          |
|------------------------------------------|----------------------------------|--------------------------------------------------------|
| Abuse in health care is:                 |                                  |                                                        |
| Relative 7                               | Legitimizing AHC?                | Abuse in health care is a summoning stone in the shoe! |
| Unintentional 8                          | Legitimizing AHC?                |                                                        |
| Unacceptable:<br>you are bound to act! 8 | Protecting the patient from AHC? |                                                        |
| Ubiquitous 9                             | Protecting the patient from AHC? |                                                        |
| Dehumanising the patient 10              | Protecting the patient from AHC? |                                                        |

Note: Figures represent the number of interviews represented in each category.



## Consolidated criteria for reporting qualitative studies (COREQ): 32-item checklist

Developed from:

Tong A, Sainsbury P, Craig J. Consolidated criteria for reporting qualitative research (COREQ): a 32-item checklist for interviews and focus groups. *International Journal for Quality in Health Care*. 2007. Volume 19, Number 6: pp. 349 – 357

**YOU MUST PROVIDE A RESPONSE FOR ALL ITEMS. ENTER N/A IF NOT APPLICABLE**

| No. Item                                       | Guide questions/description                                                                                                                              | Reported on Page #                                |
|------------------------------------------------|----------------------------------------------------------------------------------------------------------------------------------------------------------|---------------------------------------------------|
| <b>Domain 1: Research team and reflexivity</b> |                                                                                                                                                          |                                                   |
| <i>Personal Characteristics</i>                |                                                                                                                                                          |                                                   |
| 1. Inter viewer/facilitator                    | Which author/s conducted the <u>inter view</u> or focus group?                                                                                           | KS and BW                                         |
| 2. Credentials                                 | What were the researcher's credentials? E.g. PhD, MD                                                                                                     | PhD/PhD                                           |
| 3. Occupation                                  | What was their occupation at the time of the study?                                                                                                      | BW: Senior consultant gynaecologist<br>KS: Nurse  |
| 4. Gender                                      | Was the researcher male or female?                                                                                                                       | F / F                                             |
| 5. Experience and training                     | What experience or training did the researcher have?                                                                                                     | academic training<br>professor/ass. professor     |
| <i>Relationship with participants</i>          |                                                                                                                                                          |                                                   |
| 6. Relationship established                    | Was a relationship established prior to study commencement?                                                                                              | Informal meeting                                  |
| 7. Participant knowledge of the interviewer    | What did the participants know about the researcher? e.g. personal goals, reasons for doing the research                                                 | professor's<br>results from<br>earlier research   |
| 8. Interviewer characteristics                 | What characteristics were reported about the inter viewer/facilitator? e.g. Bias, assumptions, reasons and interests in the research topic               | Engagement in<br>the intervention<br>is discussed |
| <b>Domain 2: study design</b>                  |                                                                                                                                                          |                                                   |
| <i>Theoretical framework</i>                   |                                                                                                                                                          |                                                   |
| 9. Methodological orientation and Theory       | What methodological orientation was stated to underpin the study? e.g. grounded theory, discourse analysis, ethnography, phenomenology, content analysis | Grounded<br>theory                                |
| <i>Participant selection</i>                   |                                                                                                                                                          |                                                   |
| 10. Sampling                                   | How were participants selected? e.g. purposive, convenience, consecutive, snowball                                                                       | Convenience                                       |
| 11. Method of approach                         | How were participants approached? e.g. face-to-face, telephone, mail, email                                                                              | face to face<br>by coordinator                    |
| 12. Sample size                                | How many participants were in the study?                                                                                                                 | 10                                                |

|                                        |                                                                                                                                 |                                       |
|----------------------------------------|---------------------------------------------------------------------------------------------------------------------------------|---------------------------------------|
| 13. Non-participation                  | How many people refused to participate or dropped out? Reasons?                                                                 | 11 Not eligible<br>& 1 refused        |
| <i>Setting</i>                         |                                                                                                                                 |                                       |
| 14. Setting of data collection         | Where was the data collected? e.g. home, clinic, workplace                                                                      | clinic                                |
| 15. Presence of non-participants       | Was anyone else present besides the participants and researchers?                                                               | NO                                    |
| 16. Description of sample              | What are the important characteristics of the sample? e.g. demographic data, date                                               | Different<br>shift categories         |
| <i>Data collection</i>                 |                                                                                                                                 |                                       |
| 17. Interview guide                    | Were questions, prompts, guides provided by the authors? Was it pilot tested?                                                   | yes<br>not app<br>repeated interviews |
| 18. Repeat interviews                  | Were repeat inter views carried out? If yes, how many?                                                                          | 10                                    |
| 19. Audio/visual recording             | Did the research use audio or visual recording to collect the data?                                                             | AUDIO                                 |
| 20. Field notes                        | Were field notes made during and/or after the inter view or focus group?                                                        | yes                                   |
| 21. Duration                           | What was the duration of the inter views or focus group?                                                                        | appr. 60 min                          |
| 22. Data saturation                    | Was data saturation discussed?                                                                                                  | yes                                   |
| 23. Transcripts returned               | Were transcripts returned to participants for comment and/or correction?                                                        | NO                                    |
| <b>Domain 3: analysis and findings</b> |                                                                                                                                 |                                       |
| <i>Data analysis</i>                   |                                                                                                                                 |                                       |
| 24. Number of data coders              | How many data coders coded the data?                                                                                            | one                                   |
| 25. Description of the coding tree     | Did authors provide a description of the coding tree?                                                                           | no                                    |
| 26. Derivation of themes               | Were themes identified in advance or derived from the data?                                                                     | from data                             |
| 27. Software                           | What software, if applicable, was used to manage the data?                                                                      | —                                     |
| 28. Participant checking               | Did participants provide feedback on the findings?                                                                              | —                                     |
| <i>Reporting</i>                       |                                                                                                                                 |                                       |
| 29. Quotations presented               | Were participant quotations presented to illustrate the themes/findings? Was each quotation identified? e.g. participant number | yes<br>no                             |
| 30. Data and findings consistent       | Was there consistency between the data presented and the findings?                                                              | yes                                   |
| 31. Clarity of major themes            | Were major themes clearly presented in the findings?                                                                            | yes                                   |
| 32. Clarity of minor themes            | Is there a description of diverse cases or discussion of minor themes?                                                          | yes                                   |

Once you have completed this checklist, please save a copy and upload it as part of your submission. When requested to do so as part of the upload process, please select the file type: *Checklist*. You will NOT be able to proceed with



**Staff's perception of abuse in health care: a Swedish qualitative study.**

|                                 |                                                                                                                                                                                                            |
|---------------------------------|------------------------------------------------------------------------------------------------------------------------------------------------------------------------------------------------------------|
| Journal:                        | <i>BMJ Open</i>                                                                                                                                                                                            |
| Manuscript ID:                  | bmjopen-2012-001111.R2                                                                                                                                                                                     |
| Article Type:                   | Research                                                                                                                                                                                                   |
| Date Submitted by the Author:   | 18-Aug-2012                                                                                                                                                                                                |
| Complete List of Authors:       | Swahnberg, Katarina; Division of Gender and Medicine, Department of Clinical and Experimental Medicine<br>Wijma, Barbro; Division of Gender and Medicine, Department of Clinical and Experimental Medicine |
| <b>Primary Subject Heading</b>: | Medical education and training                                                                                                                                                                             |
| Secondary Subject Heading:      | Ethics, Health services research, Medical education and training, Qualitative research                                                                                                                     |
| Keywords:                       | EDUCATION & TRAINING (see Medical Education & Training), ETHICS (see Medical Ethics), QUALITATIVE RESEARCH                                                                                                 |
|                                 |                                                                                                                                                                                                            |

SCHOLARONE™  
Manuscripts

1  
2  
3 **TITLE:** Staff's perception of abuse in health care: a Swedish qualitative study.  
4  
5  
6

7 **CORRESPONDING AUTHOR:** Katarina Swahnberg PhD, Division of Gender and  
8  
9 Medicine, Department of Clinical and Experimental Medicine, Faculty of Health Sciences,  
10  
11 Linköping University, S-581 83 Linköping, Sweden.  
12

13  
14 Email: [katarina.swahnberg@liu.se](mailto:katarina.swahnberg@liu.se)  
15

16 Phone; + 46 10-103 31 91  
17  
18  
19

20  
21 **AUTHORS:** Katarina Swahnberg, Ph.D, Associate Professor & Barbro Wijma, MD, PhD,  
22  
23 Professor.  
24

25 Division of Gender and Medicine, Department of Clinical and Experimental Medicine,  
26  
27 Faculty of Health Sciences, Linköping University, Sweden.  
28

29  
30 **KEYWORDS:** abuse in health care; quality of care; ethics; qualitative method  
31  
32

33  
34 **WORD COUNT:** 4594  
35  
36  
37  
38  
39  
40  
41  
42  
43  
44  
45  
46  
47  
48  
49  
50  
51  
52  
53  
54  
55  
56  
57  
58  
59  
60

## ABSTRACT

**Objective:** The study aim was to apprehend staff's perception of abuse in health care (AHC) after an intervention based on 'Forum Play', and make comparisons to pre intervention interviews and interviews with male and female patients. AHC can be described as a failing encounter from the patient's perspective.

**Design:** Qualitative interview follow up study.

**Setting:** A Swedish Women's Clinic.

**Participants:** In a pre-intervention study 21 staff members were interviewed. Eligible for the follow up study were 14 informants who had participated in the intervention. Four declined participation leaving ten informants for this study.

**Intervention:** During January 2008 - January 2009, all staff members (N=136) were invited to participate in Forum Play workshops. Seventy-four participants took part in at least one of the seventeen half-day workshops.

**Primary outcome measures:** Staffs perception of AHC.

**Results:** The core category, 'a summoning stone in the shoe', was constructed of five categories: 'Dehumanising the patient', 'Unacceptable: you are bound to act!', 'Ubiquitous', 'Unintentional' and 'Relative'.

Forum Play had demonstrated possibilities to act even in seemingly "impossible" situations, and that the taboo status of AHC was altered at the clinic.

When our results were compared to those in the pre-intervention study, we found an *increased* awareness about AHC, *more* concrete examples of AHC, a *stronger* empathy for patients, and *fewer* explanations, justifications and trivialisations of AHC.

**Conclusion:** In this follow-up study staff's perception of AHC was closer to the patient's perspective. Compared to the pre intervention interviews staff showed a greater willingness not only to acknowledge AHC, but also to take on a responsibility to act in order to stop or

1  
2  
3 prevent AHC. Explanations for this stance could be that Forum Play had showed staff that  
4 there were possibilities to act, and that the taboo status of AHC had been broken at the clinic.  
5  
6  
7  
8  
9

## 10 11 **ARTICLE SUMMARY**

12  
13  
14  
15  
16 Article focus' (up to three bullet points on the research questions or hypotheses addressed);  
17  
18

- 19  
20 • The study objective was to apprehend changes in the attitude of health care staff to abuse in health  
21 care (AHC) after an intervention, based on 'Forum Play', developed by Augusto Boal.  
22
- 23 • Our aim was to evaluate the intervention by means of a design allowing the findings from pre  
24 intervention to be compared to those from post intervention qualitative interviews.  
25  
26  
27

28  
29  
30  
31 'Key messages' (up to three bullet points showing the key messages or significance of the study);  
32

- 33 • Informants' reported that Forum Play had demonstrated possibilities to act even in seemingly  
34 "impossible" situations, that they had acted in such situations, and that the taboo status of AHC was  
35 broken at the clinic.  
36  
37
- 38 • When our results were compared to those in the pre-intervention study, we found an increased  
39 awareness about AHC, more concrete examples of AHC, a stronger empathy for patients, and fewer  
40 explanations, justifications and trivialisations of AHC.  
41  
42
- 43 • After an intervention with Forum Play workshops, staff showed a greater willingness not only to  
44 acknowledge AHC, but also to take on the responsibility to act in order to stop or prevent AHC. The  
45 imperative to act against abuse in health care in the present study stands out as the most important  
46 result of the intervention.  
47  
48  
49  
50  
51  
52  
53

54  
55  
56 and a 'Strengths and limitations of this study' section.  
57  
58  
59  
60

- 1  
2  
3 • To conduct qualitative interviews pre and post intervention gave us a deeper understanding of  
4 changes that might have been pointed out but not thoroughly explained by means of e.g. repeated  
5 quantitative measures.  
6  
7  
8  
9 • On the other hand the approach also involves risks, e.g. the authors' involvement in the project  
10 could be assumed to increase the risk for bias both on behalf of the researchers, i.e. doing  
11 interpretations favourable to the project's success rate, as well as on behalf of the informants, i.e., a  
12 social desirability bias.  
13  
14  
15  
16  
17  
18  
19  
20  
21  
22  
23  
24  
25  
26  
27  
28  
29  
30  
31  
32  
33  
34  
35  
36  
37  
38  
39  
40  
41  
42  
43  
44  
45  
46  
47  
48  
49  
50  
51  
52  
53  
54  
55  
56  
57  
58  
59  
60
- For peer review only

## INTRODUCTION

Negative encounters in health care has been described as medical errors [1], communication failures or medical mishaps [2], patient dissatisfaction [3], sexual misconduct [4] etc.

Many of these negative encounters have to be investigated but what if there was no medical error or misconduct committed but the patient still felt abused?

Abuse in health care (AHC) covers a phenomenon different from e.g. medical errors and patient satisfaction even if there might be overlapping cases. [5]

AHC has been investigated in the Nordic countries. It is a rather new concept that has been operationalized in The NorVold Abuse Questionnaire (NorAQ) (Table 1). [6-10] Based on NorAQ the prevalence in female gynaecology patients in the Nordic countries ranged between 13-28 per cent. [11] AHC is prevalent in Sweden; 14-20 per cent in female and 8 per cent in male clinical and population based samples have had such experiences. [8, 12-14]

When we asked Swedish patients in qualitative interviews what AHC meant to them, both female and male patients expressed feelings of being disempowered and devalued. The core category in the female sample was a feeling of being “nullified” and in the male sample “mentally pinioned”. [15, 16] However, when staff was asked the same question (in the pre intervention study), the answers were quite different. They explained theoretically what AHC could be, e.g. transgression of ethical principles, but they were also occupied with explanations and justifications as to why AHC occurred, and the core category was “ethical lapses”. In accordance with their ambiguity and inability to handle AHC, it was treated with silence and as a taboo. [17] Moreover, staff’s awareness of AHC was dependent on their possibilities to act; low awareness was seen when there were few possibilities to act. [18]

High prevalence of AHC, creating long-lasting suffering among patients and little awareness about the problem among staff forced us to design and test an intervention against AHC. The



1  
2  
3 intervention was based on theories from ethics, sociology, cognitive theories and pedagogy  
4  
5 [19-24].  
6  
7  
8  
9

10 The interviews with staff mentioned above serves as a starting point in the present study that  
11 was conducted after workshops based on Forum play where the same group of staff could  
12 participate.  
13  
14

15 There is a long tradition of interventions that addresses the interpersonal component of quality  
16 of care. [25] Role play is one technique used for this purpose. [26, 27] What makes this study  
17 different is our focus on AHC. Augusto Boal, a Brazilian theatre director and pedagogue,  
18 developed many different theatre techniques to liberate people, and Theatre of the Oppressed  
19 (TO) is a characterising name used for all his techniques. Influenced by Paulo Freire's  
20 *Pedagogy of the Oppressed*, TO became a grassroots movement from the nineteen sixties and  
21 on, offering techniques based on empowerment to equip people to transform the conditions in  
22 which they were living. [19, 28] Although TO is used worldwide to promote change  
23 evaluations of success rates are scarce. [29]  
24  
25  
26  
27  
28  
29  
30  
31  
32  
33  
34  
35  
36

37 The essence of Forum Play is to create a safe place in a group session, to make the moral  
38 conflict clear, to allow feelings but focus on action, and to practice new alternatives to act.  
39 Discovering and acting out many different solutions to a situation that at first seemed  
40 impossible to solve, instils hope in Forum Players. In this intervention, Forum Players are  
41 assumed to gradually feel brave enough to transfer their experiences into real life, and try out  
42 alternative ways at their work-place to handle or prevent AHC.  
43  
44  
45  
46  
47  
48  
49

50 For this study we returned to the pre-intervention informants (staff) with the same research  
51 question, "What is AHC?" after an intervention against AHC based on Forum Play.  
52  
53  
54  
55  
56  
57  
58  
59  
60

1  
2  
3  
4  
5  
6  
7  
8  
9  
10  
11  
12  
13  
14  
15  
16  
17  
18  
19  
20  
21  
22  
23  
24  
25  
26  
27  
28  
29  
30  
31  
32  
33  
34  
35  
36  
37  
38  
39  
40  
41  
42  
43  
44  
45  
46  
47  
48  
49  
50  
51  
52  
53  
54  
55  
56  
57  
58  
59  
60

The study aim was to apprehend staff's perception of AHC after an intervention based on 'Forum Play', and make comparisons to pre intervention interviews and interviews with male and female patients.

For peer review only

## METHODS

### Procedure and material

During the period January 2008 - January 2009, all staff members at the study clinic, a women's clinic at a county hospital in the south of Sweden (N=136), were invited to participate in Forum Play workshops led by professional Forum Play leaders. [30, 31] All workshops were announced at the local hospital Intranet where staff could also register. Participation was voluntary and there was no limit to the number of workshops a staff member could participate in. Seventy-four participants took part in at least one of the seventeen half-day workshops that were held (74/136=54%).

During the workshops, staff re-enacted (role-played) situations that they had experienced or heard of when patients had felt abused in health care. The situations were different from one workshop to another, but typically included a bystander who was not intervening but felt that he or she ought to do something. The bystander usually did not act because the situation seemed to be without possible "solutions". The scene was repeated until it was clear to everyone what the moral conflict was, and who was suffering the moral conflict. [19] Then the scene was played again and the audience was encouraged to intervene. They could enter the scene and try to change the outcome by taking on the role of the person who suffered the moral conflict.

In a baseline study, we interviewed 21 staff members who were eligible for participating in the Forum Play intervention, and who represented four different staff categories. [17, 18] Eligible for the present study were those 14 informants from the original sample who had participated in the intervention (three staff members had left the clinic, and four had not participated in the intervention). Four declined participation (one gynaecologist and three auxiliaries). All interviews were booked by a coordinator employed at the clinic.

1  
2  
3 The two authors conducted ten individual semi-structured interviews: two female and one  
4  
5 male gynaecologist, one female administrator, four female midwives and two female  
6  
7 auxiliaries. Individual interviews were preferred due to the sensitive nature of the topic that  
8  
9 might evoke feelings of guilt and shame.  
10

11 The analysis presented in this study is based on answers to open-ended questions similar to  
12  
13 those in the pre-intervention study. The main question used for comparing results was: “When  
14  
15 I say abuse in health care, what is the first thing that comes to your mind?” Interviews lasted  
16  
17 on average 60 minutes. All interviews were tape-recorded and transcribed verbatim by a  
18  
19 secretary.  
20  
21

22 Written informed consent was obtained from all participants before the interview. Our request  
23  
24 to conduct the study had been approved by the regional ethical review board (Registration  
25  
26 number 194-06).  
27  
28  
29  
30  
31

### 32 **Analysis**

33  
34 We choose a qualitative approach to collect and analyse data according to Barney Glaser but  
35  
36 were also inspired by later work of Janice Morse and Kathy Chamaz. [32-35] Constant  
37  
38 comparative analysis was used to process data [33]. The transcribed interviews were analysed  
39  
40 line by line according to Glaser’s scheme of open coding to generate substantive codes, i.e.,  
41  
42 words or sentences with a relationship to the research question. [32, 33] The substantive codes  
43  
44 were constantly compared between interviews to generate new substantive codes and  
45  
46 categories. Finally, the relationship between the categories was analysed and a core category  
47  
48 that answered our research question was identified. [32] No new substantive codes emerged  
49  
50 after the fourth interview. All interviews were analysed to stabilise the categories and reach  
51  
52 saturation. In order to balance individual biases the transcripts were read and analyzed by both  
53  
54 authors, a physician and a nurse with different amount of experiences in research and clinical  
55  
56  
57  
58  
59  
60

1  
2  
3 work. The authors reached agreement on their coding through discussion. All categories are  
4  
5 described in the result section and presented in Table 2.  
6  
7  
8  
9  
10  
11  
12  
13  
14  
15  
16  
17  
18  
19  
20  
21  
22  
23  
24  
25  
26  
27  
28  
29  
30  
31  
32  
33  
34  
35  
36  
37  
38  
39  
40  
41  
42  
43  
44  
45  
46  
47  
48  
49  
50  
51  
52  
53  
54  
55  
56  
57  
58  
59  
60

For peer review only

## RESULTS

The core category, 'a summoning stone in the shoe', was constructed of five categories: 'Dehumanising the patient', 'Unacceptable: you are bound to act!', 'Ubiquitous', 'Unintentional' and 'Relative'. Each category is described separately below. The interactions between the categories are described under the headline "core category" at the end of the result section. Quotes are used to illustrate our findings.

### Dehumanising the patient

This category was built on three substantive codes:

1. *"Not finding out where the patient is"*

According to the informants, AHC could signify several things:

Not to imagine what the patient is going through:

*"You have to **imagine**, and **understand** the things you **say**; what **are** the consequences...what do you **do** and what will be the consequences. How will it be in **this** situation? For sometimes an act can **be** rather innocent, and in some situations, [certain] behaviour can be completely **catastrophic**."*

To belittle a patient's problem by comparing with other patient's problems:

*"Yes, to listen to what the other is talking about...to be focused on the one in front of you.*

*Yes, seriously, even [when you] think that's a silly little thing compared to the death [a dying person] ...in the next room."*

1  
2  
3 To be judgmental:

4  
5 *“If someone is admitted, there are not so many of them here but, gipsies...Have you locked*  
6  
7 *away your handbag? Where is my purse? They are judged awfully hard.”*  
8  
9

10  
11 Lack of cultural awareness:

12  
13  
14 Expecting that patients with a foreign background live by and accept Swedish norms like in  
15  
16 the following example might also render in AHC, according to one informant who had had to  
17  
18 console a crying patient after an examination.  
19

20  
21 *“When she came it was a shock for her [that it was a male gynaecologist] and she told them*  
22  
23 *that...she was going to see a female [gynaecologist] and then they had answered her that well*  
24  
25 *but you can't always get...what you ask for...if you seek help at such short notice then you*  
26  
27 *have to take what you can get. Everything was supposed to be quick and she just felt that she*  
28  
29 *was just...trouble for them... And she was...so sad afterwards.”*  
30  
31

32  
33  
34 2. *“Saying things that are very abusive”*  
35

36 According to the informants, AHC can be something you say or the way you say it; a few  
37  
38 words may turn a situation into a disaster for a patient.  
39

40  
41 One example: a patient with cancer was constantly throwing up. Staff had provided her with  
42  
43 bags and bowls but nothing helped, repeatedly there was vomit everywhere: on the bedside  
44  
45 table, in the bed and all over her things. Staff thought that she was capable of using the bags  
46  
47 and bowls, and discussed between them if she did it on purpose. There were sighs among the  
48  
49 staff, sometimes even audible to the patient, according to the informant. One day, a staff  
50  
51 member asked the patient if she was going to continue like this when she would go home.  
52

53  
54 Another informant remembered her own first delivery: the baby's heart sounds were getting  
55  
56 worse, the suction cup did not work, she had intravenous fluids running in both arms, and she  
57  
58  
59  
60

1  
2  
3 was screaming in pain. Then the doctor came up to her and said, “Are we going to cooperate  
4 for hell’s sake!” Afterwards she felt abused and despite her longing for another child it took  
5 years before she decided to have a second baby.  
6  
7

8  
9 Informants said that they used to think that AHC had to be a major thing, but that they now  
10 realised that AHC was often an unexpectedly small thing, and that a good situation could turn  
11 into a disaster because of a small thing. As mentioned above, the sex of the examiner might  
12 sometimes be crucial for the patient for religious or other reasons, while some staff members  
13 may consider it a small thing.  
14  
15  
16  
17  
18  
19

### 20 21 22 23 3. “They must have felt very vulnerable”

24 An informant told us about a patient that she had known for a long time whom she thought of  
25 as extremely nervous and inadequate. The patient had told her that she was afraid of hospitals.  
26  
27 Later she also told her that she had been forced to go through a gynaecological examination  
28 when she was a child, on suspicion that she had been sexually abused by or involved with an  
29 older boy.  
30  
31

32  
33  
34  
35  
36 “... she [the mother] only said, ‘now we are going to **town**’. And then they brought her to the  
37 gynaecological ward and then they **held her tightly** and she was examined. And she **screamed**  
38 and she **kicked** and she was **struggling** with them. And she said that she can’t forget this ...it  
39 is stuck with her that...that they pushed her down and **forced** her, and so on. So I think that’s  
40 a typical example of abuse in the health care and for **ten** years I’ve been wondering what’s  
41 wrong with this girl.”  
42  
43  
44  
45  
46  
47  
48

49 Power and power imbalance in relation to AHC was mentioned in several ways, e.g., the  
50 exposed position a woman has during a gynaecological examination or the patients’  
51 dependency on staff’s willingness to help and to be gentle to them: “*You are not your own*  
52 *master then.*”  
53  
54  
55  
56  
57  
58  
59  
60



1  
2  
3 One informant was also pondering about her ability to really understand what it meant to be  
4  
5 dependent and exposed as a patient:  
6

7 *“...I still think that I can feel...that you can imagine...the dependency...get an understanding*  
8  
9 *about how it is...I can never understand, but I can feel humble...I can share it...I can have*  
10  
11 *respect and understand that she has something else with her that I haven't got.”*  
12

13  
14 AHC could also mean that advantage is taken of the power inherent of one's position,  
15  
16 symbolised by, e.g., the uniforms: *“...when you put on your work clothes, then you have a*  
17  
18 *kind of...how to say it, a power position.”*  
19

### 20 21 22 23 **Unacceptable: you are bound to act!**

24  
25 The informants were prone to positioning themselves against AHC by, e.g., talking about how  
26  
27 they had (re)acted against AHC, and that it could be done in a good way, *“...but then I think*  
28  
29 *you have an obligation... to rebuke. In a loving way.”* They also emphasised that the  
30  
31 bystander had a very important role in noticing and stopping or preventing AHC, *“because*  
32  
33 *sometimes I think that it is the person who stands by...maybe more often senses when*  
34  
35 *something goes wrong than the person who is [active] in the situation”.*  
36  
37

38 There were different strategies for intervening against potentially abusive situations:

39  
40 One informant was concerned about open doors and meant that staff leaving doors open  
41  
42 jeopardised a patient's integrity. She was struggling with this problem:

43  
44 *“...it is an indication that you probably can't miss [with laughter in her voice]. No, but*  
45  
46 *sometimes when you have been sitting in the auxiliaries' expedition, there is just a sliding*  
47  
48 *door...there are patients sitting right outside and then I close the door...or when*  
49  
50 *you...hear...that they...are in a room talking and so on. Close the doors...and I close that*  
51  
52 *door [the sliding door] and then it's open again! And I close it.”*  
53  
54

55  
56 Practical arrangements for preventing AHC were discussed:  
57  
58  
59  
60

1  
2  
3 *"...there are more discussions about this [now]. About...for example, open the door into a*  
4 *room where a patient is and...how to **place** patients in a room, and how many really have to*  
5 *come into a room. So, these kinds of questions."*  
6  
7  
8

9  
10 It was also put forward that small talks over a cup of coffee could raise awareness about AHC  
11 among staff, but to talk to the patient, either before or after AHC had occurred, was seldom  
12 mentioned as an intervention. One informant interpreted this particular kind of silence as fear:

13  
14  
15 *"It must be some kind of ...fear to...realise that you are not perfect. Maybe!...Of course if you*  
16 *ask then you have to be prepared...to do something about what the patient might bring up."*  
17  
18

19  
20 In other words, asking a patient about AHC might force staff to take action, e.g., towards a  
21 colleague. Some informants stressed the importance of being earnest in such situations and  
22 talk directly to the staff involved as soon as possible. This was what the informant did who  
23 told us about the patient who expected to be examined by a female gynaecologist. When she  
24 had comforted the patient she asked her if she could talk to the staff member who had  
25 examined her, and if the patient wanted to participate in such a meeting. The patient declined t  
26  
27 *"...I was allowed to tell...how she had experienced it...I was so disturbed by what she told*  
28 *me. So I felt that I had to find out if that was how it had happened. But he had not really*  
29 *experienced it that way..."*  
30  
31

32  
33 Furthermore, there was a possibility to report upwards in the hierarchy: *"I would not hesitate*  
34 *to...contact...[silence] a foreman, my bosses [if a patient was abused]."* And there was a  
35 consensus on having an open climate at the clinic, and that it was important to be made aware  
36 when a patient was abused. Speaking up against AHC was considered an option for most  
37 informants:  
38  
39

40  
41 *"That you say, 'you can't behave like that'. So I believe that...people would tell you...I*  
42 *believe that there are few who would not dare to speak up...I believe they would speak to a*  
43 *colleague."*  
44  
45  
46  
47  
48  
49  
50

## Ubiquitous

AHC was often described in a broad sense as something that can happen to anyone at any age: patients, staff, relatives and friends to the patient. Anybody can become a victim or an agent (actor or bystander) of AHC: *“...we are abusing each other...all the way down to the patient...”*

AHC was also interpreted as staff being abusive against other staff, for instance by making remarks in a harsh way. It was also pointed out that a patient who had witnessed staff treating each other badly might feel hesitant to ask even important questions for their own sake.

One abusive situation between members of staff described as common was when a midwife called for a doctor and that doctor called for another doctor, and the two of them did not involve the midwife when they discussed the patient.

It was also hypothesised that staff experiencing abuse from other staff might subconsciously take it out on someone else: *“...if I am abused then I will look for someone...that...I have power over.”* And that someone is likely to be a patient: *“...it is easier to abuse when there is some kind of power relation... and when there is a kind of malady between us.”*

However, patients abused by staff were considered the most serious kind of AHC: *“...the most serious is if we, the staff...abuse patients or relatives. That is another situation I believe.”*

Informants also agreed that patients were the most common victims of AHC, and that if patients abused staff it should be understood differently: *“Because there might be...patients who abuse staff in many ways, so to say. But on the other hand, they are in another position...worry can turn you...rather nasty, really.”*

### Unintentional

AHC was believed to be a common experience among patients. Most informants said that AHC was usually unintentional on behalf of the staff, and that often involved staff was not even aware that it had happened. *“...they are not aware, surely. But then I have to...become aware of how people might experience what I do.”*

A variety of explanations of the occurrence of AHC were brought forward, and it was pointed out several times that AHC did not come from evilness in staff members, but rather from a lack of consideration and empathy.

Not being reflective could result in a routine manner or performance. One example given was that of an authority, like the gynaecologist who was often believed to be under time restraints, who simply follows an old habit: focusing on getting things done instead of on the patient.

*“...it’s so easy to follow... the same footsteps all the time...”*

Another example of unintentional AHC was when staff members made jokes between themselves about, e.g., someone being fat, and other staff members were laughing without reflecting on what they were laughing at, or if they ought to put an end to it.

It was also brought forward that unawareness of AHC could be due to inadequate communication skills, e.g., if staff was not sensible enough to read the patient’s body language.

The uniqueness in each and everyone’s characters was appreciated, but sometimes, if a colleague was known to be harsh without meaning it or even noticing it her- or himself, there was a moral conflict. A bystanding staff member would in such a situation understand that the patient might feel abused, and at the same time know that the “harsh” staff member did not mean to abuse the patient. This was considered a difficult situation, but as one informant concluded,

1  
2  
3 “...it’s about personality, too, so it’s really difficult to know how to tackle it. It’s interesting  
4 that people are different, but on the other hand you don’t want those differences to befall the  
5 patients so that they feel abused, or maltreated.”  
6  
7  
8  
9

### 10 11 **Relative**

12  
13 The informants were provoked by the word “abuse” in AHC, and prone to take a defending  
14 position against it. They thought of “abuse” (kränkning in Swedish) as a very strong word,  
15 that was sometimes used too often and in an inappropriate way. The informants thought that,  
16 especially in the rest of the society (outside the hospital), the word “abuse” had suffered  
17 inflation. “I think that ‘abuse’ may be a tough word...It’s a worn out word or a word that is  
18 used incorrectly...”  
19  
20  
21  
22  
23  
24  
25  
26

27 Informants agreed that AHC was a difficult concept to define. On the one hand, AHC was  
28 considered a strong word, and yet AHC could be a small thing. “...there is no such...scientific  
29 quantitative concept [saying] that this is abuse.”  
30  
31  
32  
33

34 The wording seemed important to the informants and a more neutral word for AHC was  
35 desired by some of the informants, e.g., (negative) encounters (bemötande in Swedish).  
36 AHC was considered a personal experience, and it was expressed that patients were more or  
37 less vulnerable to this experience. It was also brought forward that there were reasonable  
38 experiences that made some patients more vulnerable to AHC than others, e.g., through a  
39 history of abuse.  
40  
41  
42  
43  
44  
45  
46  
47  
48

### 49 **Core category**

50  
51 The three categories ‘Dehumanising the patient’, ‘unacceptable: you are bound to act!’ and  
52 ‘ubiquitous’ are strongly linked to each other in many ways, not the least because of their  
53 potentially patient protective components. The category ‘Dehumanising the patient’ implies  
54  
55  
56  
57  
58  
59  
60

1  
2  
3 not being seen as a human being, stripped of human value. The codes that filled out this  
4  
5 category were characterised by moral imagination and respect for the patient's situation. The  
6  
7 informants showed great insight into patients' vulnerability and their own responsibility in  
8  
9 relation to AHC. The fact that the informants gave several detailed examples of AHC  
10  
11 underlined their emotional engagement. This engagement was a strong reason for staff to  
12  
13 adopt a clear position against AHC, expressed in the category 'unacceptable: you are bound to  
14  
15 act!' It was also made clear that acting against AHC was beneficial not only for the patient but  
16  
17 also for staff: "*...that's what we really ought to do [talk to each other when we think a patient*  
18  
19 *might feel abused] ...we take responsibility for each other that way.*"

20  
21  
22 The category 'ubiquitous', indicated that the informants were now more prone to recognise  
23  
24 AHC. This openness could be seen as a mediator that enabled staff to talk about AHC, which  
25  
26 probably contributed to a milieu where staff felt some pressure to also act against AHC.  
27  
28

29  
30 However, there were contradictions in the staff's definitions of AHC. To claim that AHC was  
31  
32 'unintentional' was a way to describe a fact, and at the same time make AHC trivial.

33  
34 Likewise, the discussion that rendered a 'relative' definition of AHC could be seen as a  
35  
36 diversion from a topic that provoked awkward feelings. Both of these categories could be  
37  
38 used to legitimize AHC.  
39  
40  
41  
42  
43  
44  
45  
46  
47  
48  
49  
50  
51  
52  
53  
54  
55  
56  
57  
58  
59  
60

## DISCUSSION

This study focuses staff members' perception towards AHC after an intervention based on Forum Play.

### Comparing interviews from before and after the intervention

In our pre-intervention studies, staff reported detached perceptions of AHC and AHC had a taboo status at the study clinic. [17, 18] They recognised AHC as 'transgressions of ethical principles' but stated that these actions were often justifiable from a staff perspective for various reasons. [17] Staff's awareness of AHC also turned out to be a complex phenomenon restricted by their possibilities to act e.g., caused by hierarchies or because they did not know what to do since they had no tools or training in handling AHC. [18] The strongest expressions of change in the present study, when compared to the pre-intervention studies, was the *increased* awareness about AHC, *stronger* empathy for patients displayed in *more* concrete examples of, and *fewer* explanations, justifications and trivialisations of AHC. The increase of concrete examples of AHC that staff had seen or heard of was most likely a manifestation of the increased awareness of AHC among staff [18].

Moreover, the answers to the question, "what is AHC?" in the present study, are closer to the experiences of both female and male patients than those of the study that posed the same question to staff prior to the intervention, where the core category was 'ethical lapses'. [15-17] Apparently, staff's perception of AHC were closer to the patient's perspective.

### **The core category**

Despite the “resistance” we found, the overall finding is that AHC summons responsibility and urges an itch to act among staff. From having been considered a matter of mishaps - “ethical lapses” - AHC had become “a summoning stone in the shoe” [17]. By this is meant that acting against AHC had become an imperative.

The imperative to act against AHC in the present study stands out as the most important finding. The possible mechanisms for this finding could be that, 1. Forum Play had showed staff that there were possibilities to act, and 2) the taboo status of AHC had been broken at the clinic. The informants told us that AHC was present more often in their daily conversations, and it was even discussed during coffee breaks, i.e. AHC had become a shared problem. According to Galtung, direct events of violence are nurtured and legitimised by cultural and structural violence, forming a vicious triangle. [20, 23] While events of direct violence often are visible, cultural and structural violence are often not. A taboo can exemplify cultural violence. Breaking the taboo could be seen as a way to delegitimize direct events of AHC, and Forum play may have been a useful tool for this purpose since the “culture” had changed, and talking about and acting against AHC had become “the right thing to do”. However, it cannot be ruled out that any intervention against AHC that merely drew attention to the topic would have been useful. Therefore it would be interesting to compare different strategies to counteract AHC in future studies.

### **From disavowal to responsibility**

The resistance against and disavowal of AHC found in the pre-intervention studies had not only decreased, it had also changed character. [17, 18] For example, before the intervention informants strongly emphasized that they were abused too. Now they had attained a more general and less defensive view; anybody could get involved in AHC as an actor or a victim.



1  
2  
3 Moreover, it was considered much worse if a patient was abused by staff, because staff had  
4 more powerful positions than patients and they were entrusted with the patients' vulnerability.  
5  
6  
7 AHC was still considered to be acted out unintentionally, but the argument was no longer  
8  
9  
10 used to explain or justify AHC. Instead it was used as an incentive to become more aware  
11  
12 about AHC.

13  
14 How to define AHC was still problematic to the informants. Obviously AHC had been a new  
15  
16 terminology for them, but the wish to rename AHC into a more "comfortable" concept is  
17  
18 interesting. It is likely that the concept AHC gradually will be exchanged for the more neutral  
19  
20 "a failing encounter" at this clinic.  
21

### 22 23 24 25 **Limitations**

26  
27 One of the study limitations is that it is based on few interviews; only ten out of 21 informants  
28  
29 took part in the follow up study. In spite of this drawback we could establish that no new  
30  
31 substantive codes emerged after the fourth interview. Early saturation indicates that there  
32  
33 were more similarities than differences in staff's experiences of AHC. Six more interviews  
34  
35 were conducted to fill up categories and assure saturation, but it cannot be ruled out that yet  
36  
37 another interview could have added new information or that people who declined to  
38  
39 participate in the follow up interviews might have had very different views to those who did  
40  
41 participate.  
42  
43

44  
45 To conduct qualitative follow-up interviews gave us a deeper understanding of changes that  
46  
47 might have been pointed out but not have been thoroughly explained by means of e.g.  
48  
49 repeated quantitative measures. On the other hand, the approach also involves risks, e.g. the  
50  
51 authors' involvement in the project could be assumed to increase the risk for bias both on  
52  
53 behalf of the researchers, i.e. doing interpretations favourable to the project's success rate, as  
54  
55 well as on behalf of the informants, i.e., a social desirability bias. [36] In an effort to  
56  
57  
58  
59  
60

1  
2  
3 counteract these biases, external independent researchers repeated interviews as well as  
4  
5 analyses. An external researcher analysed de novo the interviews in the present study. This  
6  
7 analysis also showed that staff's perception of AHC had approached the patient perspective  
8  
9 [37]. New interviews were conducted by a consultant who was not involved in the project and  
10  
11 with a different sample of staff who had also participated in the intervention. The results  
12  
13 described a positive change from before till after the intervention, not only in perception but  
14  
15 also in actions. Several examples were given where staff members had been "experimenting"  
16  
17 with different ways to prevent or handle AHC, also where it meant confronting a colleague.  
18  
19  
20 [38]  
21  
22  
23  
24

## 25 CONCLUSION

26  
27  
28  
29 In this follow-up study staff's perception of AHC were closer to the patient's perspective.  
30  
31 Compared to the pre intervention interviews staff showed a greater willingness not only to  
32  
33 acknowledge AHC, but also to take on a responsibility to act in order to stop or prevent AHC.  
34  
35 Explanations for this stance could be that Forum Play had showed staff that there were  
36  
37 possibilities to act, and that the taboo status of AHC had been broken at the clinic.  
38  
39  
40  
41  
42  
43  
44  
45  
46  
47  
48  
49  
50  
51  
52  
53  
54  
55  
56  
57  
58  
59  
60

## REFERENCES

1. McFadden KL, Stock GN, Gowen CR, 3rd. Exploring strategies for reducing hospital errors. *J Healthc Manag* 2006;**51**(2):123-35; discussion 36.
2. Sutcliffe KM, Lewton E, Rosenthal MM. Communication failures: An insidious contributor to medical mishaps. *Acad Med* 2004;**79**(2):186-94.
3. Coyle J, Williams B. Seeing the wood for the trees: defining the forgotten concept of patient dissatisfaction in the light of patient satisfaction research. *Int J Health Care Qual Assur Inc Leadersh Health Serv* 1999;**12**(6-7):i-ix.
4. Lamont JA, Woodward C. Patient-physician sexual involvement: a Canadian survey of obstetrician-gynecologists. *Can Med Assoc J* 1994;**150**(9):1433-9.
5. Bruggemann AJ, Wijma B, Swahnberg K. Abuse in health care: a concept analysis. *Scand J Caring Sci* 2012;**26**(1):123-32.
6. Wijma B, Schei B, Swahnberg K. et al. The NorVold Abuse Questionnaire. Linköping: Division of Gender and Medicine, Faculty of Health Sciences, Linköping University, 2004.
7. Wijma B, Schei B, Swahnberg K et al. Emotional, physical, and sexual abuse in patients visiting gynaecology clinics: a Nordic cross-sectional study. *Lancet* 2003;**361**(9375):2107-13.
8. Swahnberg K. Prevalence of gender violence. Studies of four kinds of abuse in five Nordic countries [Doctoral Thesis]. Faculty of Health Sciences, Linköping University, 2003.
9. Swahnberg K. NorVold Abuse Questionnaire for men (m-NorAQ): validation of new measures of emotional, physical, and sexual abuse and abuse in health care in male patients. *Gend Med* 2011;**8**(2):69-79.

- 1  
2  
3 10. Swahnberg K, Wijma B. The NorVold Abuse Questionnaire (NorAQ): Validation of new  
4  
5 measures of emotional, physical, and sexual abuse, and abuse in the health care system  
6  
7 among women. *Eur J Public Health* 2003;**13**(4):361-6.  
8
- 9  
10 11. Swahnberg K, Schei B, Hilden M et al. Patients' experiences of abuse in health care: a  
11  
12 Nordic study on prevalence and associated factors in gynecological patients. *Acta*  
13  
14 *Obstet Gynecol Scand* 2007;**86**(3):349-56.  
15
- 16 12. Swahnberg K, Davidsson J, Hearn J et al. Men's experiences of emotional, physical and  
17  
18 sexual abuse, and abuse in health care: A cross-sectional study of a Swedish random  
19  
20 male population sample. *Scand J Public Health. In press* 2011.  
21
- 22 13. Swahnberg K, Hearn J, Wijma B. Prevalence of perceived experiences of emotional,  
23  
24 physical, sexual, and health care abuse in a Swedish male patient sample. *Violence*  
25  
26 *and Victims* 2009;**24**(2):275-86.  
27
- 28 14. Swahnberg K, Wijma B, Schei B et al. Are sociodemographic and regional and sample  
29  
30 factors associated with prevalence of abuse? *Acta Obstet Gynecol Scand*  
31  
32 2004;**83**(3):276-88.  
33
- 34 15. Swahnberg K, Thapar-Bjorkert S, Bertero C. Nullified: women's perceptions of being  
35  
36 abused in health care. *J Psychosom Obstet Gynaecol* 2007;**28**(3):161-7.  
37
- 38 16. Swahnberg K, Wijma B, Hearn J et al. Mentally pinioned: Men's perceptions of being  
39  
40 abused in health care. *Int J Mens Health* 2009;**8**(1):60-71.  
41
- 42 17. Swahnberg K, Zbikowski A, Wijma B. Ethical lapses: staff's perception of abuse in health  
43  
44 care. *J Psychosom Obstet Gynaecol* 2010;**31**(3):123-9.  
45
- 46 18. Swahnberg K, Wijma B. Staff's awareness of abuse in health care varies according to  
47  
48 context and possibilities to act. *J Psychosom Obstet Gynaecol* 2011;**32**(2):65-71.  
49
- 50 19. Boal A. *Games for actors and non-actors*. London/NewYork: Routledge, 1992.  
51
- 52 20. Galtung J. Violence, Peace and Peace Research. *J Peace Research* 1969;**6**:167-91.  
53  
54  
55  
56  
57  
58  
59  
60

- 1  
2  
3 21. Glover J. *Humanity. A moral history of the twentieth century*. London: Pimlico, 2001.
- 4  
5 22. Zimbardo P. *The Lucifer effect. Understanding how good people turn evil*. New York:  
6  
7 Random House, Inc, 2008.
- 8  
9 23. Galtung J. Cultural Violence. *J Peace Research* 1990;**27**(3):291-305.
- 10  
11 24. Beck J. *Cognitive therapy: basics and beyond*. New York: The Guilford Press, 1995.
- 12  
13 25. Fonn S, Mtonga AS, Nkoloma HC et al. Health providers' opinions on provider-client  
14 relations: results of a multi-country study to test Health Workers for Change. *Health*  
15 *Policy Plan* 2001;**16 Suppl 1**:19-23.
- 16  
17 26. Fonn S, Xaba M. Health Workers for Change: developing the initiative. *Health Policy*  
18 *Plan* 2001;**16 Suppl 1**:13-8.
- 19  
20 27. Ammentorp J, Kofoed P-E. Being a patient in your own department. *Patient Educ Couns*  
21 *2010*;**81**:142-3.
- 22  
23 28. Freire P. *Pedagogy of the Oppressed - Divide and Oppress*. Casa De Las Americas  
24 1986(159):148-51.
- 25  
26 29. Österlind E. Acting out of habits – can Theatre of the Oppressed promote change? Boal's  
27 theatre methods in relation to Bourdieu's concept of habitus. *Research in Drama*  
28 *Education: The Journal of Applied Theatre and Performance* 2008;**13**(1):71-82.
- 29  
30 30. Stocker SS. *Staging the Moral Imagination in the Health Care Setting*. Linköping:  
31 Division of Gender and Medicine, Faculty of Health Sciences, Linköping University,  
32 2011.
- 33  
34 31. Josephson A. *Praktisk kunskap i att förhindra kränkningar. Rapport om dramapedagogiskt*  
35 *arbete med vårdpersonal (Practical knowledge in counteracting abuse in health care.*  
36 *Report on drama pedagogic work among health care staff)*. Linköping: Division of  
37 Gender and Medicine, Faculty of Health Sciences, Linköping University, 2011.
- 38  
39 32. Glaser B. *Theoretical sensitivity*. 4 ed. Mill Valley, CA: Sociology Press, 1978.
- 40  
41  
42  
43  
44  
45  
46  
47  
48  
49  
50  
51  
52  
53  
54  
55  
56  
57  
58  
59  
60

- 1  
2  
3 33. Glaser B. *Basics of grounded theory analysis. Emergence versus forcing*. Mill Valley,  
4  
5 CA: Sociology Press, 1992.  
6  
7 34. Morse JM, editor. *Developing grounded theory. The second generaton*. Walnut Creek:  
8  
9 Left coast press, INC, 2009.  
10  
11 35. Charmaz K. *Constructing Grounded Theory. A practical guide through qualitative*  
12  
13 *analysis*. London: SAGE Publications Ltd, 2009.  
14  
15  
16 36. Saunders DG. Procedures for adjusting self-reports of violence for social desirability bias.  
17  
18 *J Interpersonal Violence* 1991;6(3):336-44.  
19  
20 37. Swahnberg K, Berterö C. Minimizing human dignity: staff's perception of abuse in health  
21  
22 care. *Accepted* 2012.  
23  
24  
25 38. Nilsson A. Evaluering av projektet "kränkningar i vården" (Evaluation of the project  
26  
27 "abuse in health care"). In: Swahnberg K, editor. Linköping: Division of Gender and  
28  
29 Medicine, Faculty of Health Sciences, Linköping University, 2010.  
30  
31  
32  
33  
34  
35  
36  
37

38 **Funding:** The Swedish Research Council

39  
40 **Competing Interests Statement :** There are no competing interests .

41  
42  
43 **Contributorship Statement:** The authors have collaborated in designing and conducting and  
44  
45 writing the report of this study. Both authors fulfil the ICMJE guidelines for authorship '1) substantial  
46  
47 contributions to conception and design, acquisition of data, or analysis and interpretation of data; 2)  
48  
49 drafting the article or revising it critically for important intellectual content; and 3) final approval of  
50  
51 the version to be published.  
52

53  
54 **Data Sharing Statement:** No additional unpublished data is available from this study  
55  
56  
57  
58  
59  
60

**Table 1. Questions in NorAQ about abuse in health care.**

|                | <b>ABUSE IN HEALTH CARE</b>                                                                                                                                                                                                              |
|----------------|------------------------------------------------------------------------------------------------------------------------------------------------------------------------------------------------------------------------------------------|
| Mild abuse     | Have you ever felt offended or grossly degraded while visiting health services, felt that someone exercised blackmail against you or did not show respect for                                                                            |
| Moderate abuse | your opinion - in such a way that you were later disturbed by or suffered from the experience?                                                                                                                                           |
| Severe abuse   | Have you ever experienced that a "normal" event while visiting health services, suddenly became a really terrible and insulting experience, without you fully knowing how this could happen?                                             |
|                | Have you experienced anybody in health service purposely - as you understood - hurting you physically or mentally, grossly violating you or using your body and your subordinated position to your disadvantage for his/her own purpose? |
|                | <b>ANSWER ALTERNATIVES (THE SAME FOR ALL QUESTIONS)</b>                                                                                                                                                                                  |
|                | 1 = No, 2 = Yes, as a child (<18 years), 3 = Yes, as an adult (≥18 years), 4 = Yes, as a child and as an adult                                                                                                                           |

**Table 2. Categories and Core category answering the research question: what is abuse in health care?**

| Categories                            | Function?                        | Core category                                          |
|---------------------------------------|----------------------------------|--------------------------------------------------------|
| Abuse in health care is:              |                                  |                                                        |
| Relative 7                            | Legitimizing AHC?                | Abuse in health care is a summoning stone in the shoe! |
| Unintentional 8                       | Legitimizing AHC?                |                                                        |
| Unacceptable: you are bound to act! 8 | Protecting the patient from AHC? |                                                        |
| Ubiquitous 9                          | Protecting the patient from AHC? |                                                        |
| Dehumanising the patient 10           | Protecting the patient from AHC? |                                                        |

Note: Figures represent the number of interviews represented in each category.



1  
2  
3 **TITLE:** Staff's perception of abuse in health care: a Swedish qualitative study.  
4  
5

6  
7 **CORRESPONDING AUTHOR:** Katarina Swahnberg PhD, Division of Gender and  
8  
9 Medicine, Department of Clinical and Experimental Medicine, Faculty of Health Sciences,  
10  
11 Linköping University, S-581 83 Linköping, Sweden.  
12

13  
14 Email: [katarina.swahnberg@liu.se](mailto:katarina.swahnberg@liu.se)  
15

16  
17 Phone; + 46 10-103 31 91  
18  
19

20  
21 **AUTHORS:** Katarina Swahnberg, Ph.D, Associate Professor & Barbro Wijma, MD, PhD,  
22  
23 Professor.  
24  
25 Division of Gender and Medicine, Department of Clinical and Experimental Medicine,  
26  
27 Faculty of Health Sciences, Linköping University, Sweden.  
28  
29

30  
31  
32 **FUNDING:** The Swedish Research Council  
33  
34

35  
36 **KEYWORDS:** abuse in health care; quality of care; ethics; qualitative method  
37  
38

39  
40  
41 **WORD COUNT:** 4594  
42  
43  
44  
45  
46  
47  
48  
49  
50  
51  
52  
53  
54  
55  
56  
57  
58  
59  
60

**ABSTRACT**

**Objective:** The study aim was to apprehend staff's perception of abuse in health care (AHC) after an intervention based on 'Forum Play', and make comparisons to pre intervention interviews and interviews with male and female patients. AHC can be described as a failing encounter from the patient's perspective.

**Design:** Qualitative interview follow up study.

**Setting:** A Swedish Women's Clinic.

**Participants:** In a pre-intervention study 21 staff members were interviewed. Eligible for the follow up study were 14 informants who had participated in the intervention. Four declined participation leaving ten informants for this study.

**Intervention:** During January 2008 - January 2009, all staff members (N=136) were invited to participate in Forum Play workshops. **Seventy-four participants took part in at least one of the seventeen half-day workshops.**

**Primary outcome measures:** Staffs perception of AHC.

**Results:** The core category, 'a summoning stone in the shoe', was constructed of five categories: 'Dehumanising the patient', 'Unacceptable: you are bound to act!', 'Ubiquitous', 'Unintentional' and 'Relative'.

Forum Play had demonstrated possibilities to act even in seemingly "impossible" situations, and that the taboo status of AHC was altered at the clinic.

When our results were compared to those in the pre-intervention study, we found an *increased* awareness about AHC, *more* concrete examples of AHC, a *stronger* empathy for patients, and *fewer* explanations, justifications and trivialisations of AHC.

**Conclusion:** In this follow-up study staff's perception of AHC was closer to the patient's perspective. Compared to the pre intervention interviews staff showed a greater willingness not only to acknowledge AHC, but also to take on a responsibility to act in order to stop or

1  
2  
3 prevent AHC. Explanations for this stance could be that Forum Play had showed staff that  
4  
5 there were possibilities to act, and that the taboo status of AHC had been broken at the clinic.  
6  
7  
8  
9  
10  
11  
12  
13  
14  
15  
16  
17  
18  
19  
20  
21  
22  
23  
24  
25  
26  
27  
28  
29  
30  
31  
32  
33  
34  
35  
36  
37  
38  
39  
40  
41  
42  
43  
44  
45  
46  
47  
48  
49  
50  
51  
52  
53  
54  
55  
56  
57  
58  
59  
60

For peer review only

## INTRODUCTION

Negative encounters in health care has been described as medical errors [1], communication failures or medical mishaps [2], patient dissatisfaction [3], sexual misconduct [4] etc.

Many of these negative encounters have to be investigated but what if there was no medical error or misconduct committed but the patient still felt abused?

Abuse in health care (AHC) covers a phenomenon different from e.g. medical errors and patient satisfaction even if there might be overlapping cases. [5]

AHC has been investigated in the Nordic countries. It is a rather new concept that has been operationalized in The NorVold Abuse Questionnaire (NorAQ) (Table 1). [6-10] Based on NorAQ the prevalence in female gynaecology patients in the Nordic countries ranged between 13-28 per cent. [11] AHC is prevalent in Sweden; 14-20 per cent in female and 8 per cent in male clinical and population based samples have had such experiences. [8, 12-14]

When we asked Swedish patients in qualitative interviews what AHC meant to them, both female and male patients expressed feelings of being disempowered and devalued. The core category in the female sample was a feeling of being “nullified” and in the male sample “mentally pinioned”. [15, 16] However, when staff was asked the same question (in the pre intervention study), the answers were quite different. They explained theoretically what AHC could be, e.g. transgression of ethical principles, but they were also occupied with explanations and justifications as to why AHC occurred, and the core category was “ethical lapses”. In accordance with their ambiguity and inability to handle AHC, it was treated with silence and as a taboo. [17] Moreover, staff’s awareness of AHC was dependent on their possibilities to act; low awareness was seen when there were few possibilities to act. [18]

High prevalence of AHC, creating long-lasting suffering among patients and little awareness about the problem among staff forced us to design and test an intervention against AHC. The

1  
2  
3 intervention was based on theories from ethics, sociology, cognitive theories and pedagogy  
4  
5 [19-24].  
6  
7  
8  
9

10 The interviews with staff mentioned above serves as a starting point in the present study that  
11 was conducted after workshops based on Forum play where the same group of staff could  
12 participate.  
13  
14

15 There is a long tradition of interventions that addresses the interpersonal component of quality  
16 of care. [25] Role play is one technique used for this purpose. [26, 27] What makes this study  
17 different is our focus on AHC. Augusto Boal, a Brazilian theatre director and pedagogue,  
18 developed many different theatre techniques to liberate people, and Theatre of the Oppressed  
19 (TO) is a characterising name used for all his techniques. Influenced by Paulo Freire's  
20 *Pedagogy of the Oppressed*, TO became a grassroots movement from the nineteen sixties and  
21 on, offering techniques based on empowerment to equip people to transform the conditions in  
22 which they were living. [19, 28] Although TO is used worldwide to promote change  
23 evaluations of success rates are scarce. [29]  
24  
25  
26  
27  
28  
29  
30  
31  
32  
33  
34  
35  
36

37 The essence of Forum Play is to create a safe place in a group session, to make the moral  
38 conflict clear, to allow feelings but focus on action, and to practice new alternatives to act.  
39 Discovering and acting out many different solutions to a situation that at first seemed  
40 impossible to solve, instils hope in Forum Players. In this intervention, Forum Players are  
41 assumed to gradually feel brave enough to transfer their experiences into real life, and try out  
42 alternative ways at their work-place to handle or prevent AHC.  
43  
44  
45  
46  
47  
48  
49

50 For this study we returned to the pre-intervention informants (staff) with the same research  
51 question, "What is AHC?" after an intervention against AHC based on Forum Play.  
52  
53  
54  
55  
56  
57  
58  
59  
60

1  
2  
3  
4  
5  
6  
7  
8  
9  
10  
11  
12  
13  
14  
15  
16  
17  
18  
19  
20  
21  
22  
23  
24  
25  
26  
27  
28  
29  
30  
31  
32  
33  
34  
35  
36  
37  
38  
39  
40  
41  
42  
43  
44  
45  
46  
47  
48  
49  
50  
51  
52  
53  
54  
55  
56  
57  
58  
59  
60

The study aim was to apprehend staff's perception of AHC after an intervention based on 'Forum Play', and make comparisons to pre intervention interviews and interviews with male and female patients.

For peer review only

## METHODS

### Procedure and material

During the period January 2008 - January 2009, all staff members at the study clinic, a women's clinic at a county hospital in the south of Sweden (N=136), were invited to participate in Forum Play workshops led by professional Forum Play leaders. [30, 31] All workshops were announced at the local hospital Intranet where staff could also register.

Participation was voluntary and there was no limit to the number of workshops a staff member could participate in. Seventy-four participants took part in at least one of the seventeen half-day workshops that were held (74/136=54%).

During the workshops, staff re-enacted (role-played) situations that they had experienced or heard of when patients had felt abused in health care. The situations were different from one workshop to another, but typically included a bystander who was not intervening but felt that he or she ought to do something. The bystander usually did not act because the situation seemed to be without possible "solutions". The scene was repeated until it was clear to everyone what the moral conflict was, and who was suffering the moral conflict. [19] Then the scene was played again and the audience was encouraged to intervene. They could enter the scene and try to change the outcome by taking on the role of the person who suffered the moral conflict.

In a baseline study, we interviewed 21 staff members who were eligible for participating in the Forum Play intervention, and who represented four different staff categories. [17, 18] Eligible for the present study were those 14 informants from the original sample who had participated in the intervention (three staff members had left the clinic, and four had not participated in the intervention). Four declined participation (one gynaecologist and three auxiliaries). All interviews were booked by a coordinator employed at the clinic.

1  
2  
3 The two authors conducted ten individual semi-structured interviews: two female and one  
4  
5 male gynaecologist, one female administrator, four female midwives and two female  
6  
7 auxiliaries. Individual interviews were preferred due to the sensitive nature of the topic that  
8  
9 might evoke feelings of guilt and shame.  
10

11 The analysis presented in this study is based on answers to open-ended questions similar to  
12  
13 those in the pre-intervention study. The main question used for comparing results was: “When  
14  
15 I say abuse in health care, what is the first thing that comes to your mind?” Interviews lasted  
16  
17 on average 60 minutes. All interviews were tape-recorded and transcribed verbatim by a  
18  
19 secretary.  
20  
21

22 Written informed consent was obtained from all participants before the interview. Our request  
23  
24 to conduct the study had been approved by the regional ethical review board (Registration  
25  
26 number 194-06).  
27  
28  
29  
30  
31

### 32 **Analysis**

33  
34 We choose a qualitative approach to collect and analyse data according to Barney Glaser but  
35  
36 were also inspired by later work of Janice Morse and Kathy Chamaz. [32-35] Constant  
37  
38 comparative analysis was used to process data [33]. The transcribed interviews were analysed  
39  
40 line by line according to Glaser’s scheme of open coding to generate substantive codes, i.e.,  
41  
42 words or sentences with a relationship to the research question. [32, 33] The substantive codes  
43  
44 were constantly compared between interviews to generate new substantive codes and  
45  
46 categories. Finally, the relationship between the categories was analysed and a core category  
47  
48 that answered our research question was identified. [32] No new substantive codes emerged  
49  
50 after the fourth interview. All interviews were analysed to stabilise the categories and reach  
51  
52 saturation. In order to balance individual biases the transcripts were read and analyzed by both  
53  
54 authors, a physician and a nurse with different amount of experiences in research and clinical  
55  
56  
57  
58  
59  
60



1  
2  
3 work. The authors reached agreement on their coding through discussion. All categories are  
4  
5 described in the result section and presented in Table 2.  
6  
7  
8  
9  
10  
11  
12  
13  
14  
15  
16  
17  
18  
19  
20  
21  
22  
23  
24  
25  
26  
27  
28  
29  
30  
31  
32  
33  
34  
35  
36  
37  
38  
39  
40  
41  
42  
43  
44  
45  
46  
47  
48  
49  
50  
51  
52  
53  
54  
55  
56  
57  
58  
59  
60

For peer review only

## RESULTS

The core category, 'a summoning stone in the shoe', was constructed of five categories: 'Dehumanising the patient', 'Unacceptable: you are bound to act!', 'Ubiquitous', 'Unintentional' and 'Relative'. Each category is described separately below. The interactions between the categories are described under the headline "core category" at the end of the result section. **Quotes are used to illustrate our findings.**

### Dehumanising the patient

This category was built on three substantive codes:

1. *"Not finding out where the patient is"*

According to the informants, AHC could signify several things:

Not to imagine what the patient is going through:

*"You have to **imagine**, and **understand** the things you **say**; what **are** the consequences...what do you **do** and what will be the consequences. How will it be in **this** situation? For sometimes an act can **be** rather innocent, and in some situations, [certain] behaviour can be completely **catastrophic**."*

To belittle a patient's problem by comparing with other patient's problems:

*"Yes, to listen to what the other is talking about...to be focused on the one in front of you. Yes, seriously, even [when you] think that's a silly little thing compared to the death [a dying person] ...in the next room."*

1  
2  
3 To be judgmental:

4  
5 *“If someone is admitted, there are not so many of them here but, gipsies...Have you locked*  
6  
7 *away your handbag? Where is my purse? They are judged awfully hard.”*  
8  
9

10  
11  
12 Lack of cultural awareness:

13  
14 Expecting that patients with a foreign background live by and accept Swedish norms like in  
15  
16 the following example might also render in AHC, according to one informant who had had to  
17  
18 console a crying patient after an examination.  
19

20  
21 *“When she came it was a shock for her [that it was a male gynaecologist] and she told them*  
22  
23 *that...she was going to see a female [gynaecologist] and then they had answered her that well*  
24  
25 *but you can't always get...what you ask for...if you seek help at such short notice then you*  
26  
27 *have to take what you can get. Everything was supposed to be quick and she just felt that she*  
28  
29 *was just...trouble for them... And she was...so sad afterwards.”*  
30  
31

32  
33  
34 2. *“Saying things that are very abusive”*  
35

36 According to the informants, AHC can be something you say or the way you say it; a few  
37  
38 words may turn a situation into a disaster for a patient.  
39

40  
41 One example: a patient with cancer was constantly throwing up. Staff had provided her with  
42  
43 bags and bowls but nothing helped, repeatedly there was vomit everywhere: on the bedside  
44  
45 table, in the bed and all over her things. Staff thought that she was capable of using the bags  
46  
47 and bowls, and discussed between them if she did it on purpose. There were sighs among the  
48  
49 staff, sometimes even audible to the patient, according to the informant. One day, a staff  
50  
51 member asked the patient if she was going to continue like this when she would go home.  
52

53  
54 Another informant remembered her own first delivery: the baby's heart sounds were getting  
55  
56 worse, the suction cup did not work, she had intravenous fluids running in both arms, and she  
57  
58  
59  
60

1  
2  
3 was screaming in pain. Then the doctor came up to her and said, “Are we going to cooperate  
4 for hell’s sake!” Afterwards she felt abused and despite her longing for another child it took  
5 years before she decided to have a second baby.  
6  
7

8  
9 Informants said that they used to think that AHC had to be a major thing, but that they now  
10 realised that AHC was often an unexpectedly small thing, and that a good situation could turn  
11 into a disaster because of a small thing. As mentioned above, the sex of the examiner might  
12 sometimes be crucial for the patient for religious or other reasons, while some staff members  
13 may consider it a small thing.  
14  
15  
16  
17  
18  
19

20  
21  
22  
23 3. “They must have felt very vulnerable”  
24

25 An informant told us about a patient that she had known for a long time whom she thought of  
26 as extremely nervous and inadequate. The patient had told her that she was afraid of hospitals.  
27  
28 Later she also told her that she had been forced to go through a gynaecological examination  
29 when she was a child, on suspicion that she had been sexually abused by or involved with an  
30 older boy.  
31  
32  
33  
34

35  
36 “... she [the mother] only said, ‘now we are going to **town**’. And then they brought her to the  
37 gynaecological ward and then they **held her tightly** and she was examined. And she **screamed**  
38 and she **kicked** and she was **struggling** with them. And she said that she can’t forget this ...it  
39 is stuck with her that...that they pushed her down and **forced** her, and so on. So I think that’s  
40 a typical example of abuse in the health care and for **ten** years I’ve been wondering what’s  
41 wrong with this girl.”  
42  
43  
44  
45  
46  
47  
48

49 Power and power imbalance in relation to AHC was mentioned in several ways, e.g., the  
50 exposed position a woman has during a gynaecological examination or the patients’  
51 dependency on staff’s willingness to help and to be gentle to them: “You are not your own  
52 master then.”  
53  
54  
55  
56  
57  
58  
59  
60

1  
2  
3 One informant was also pondering about her ability to really understand what it meant to be  
4  
5 dependent and exposed as a patient:  
6

7 *"...I still think that I can feel...that you can imagine...the dependency...get an understanding*  
8  
9 *about how it is...I can never understand, but I can feel humble...I can share it...I can have*  
10  
11 *respect and understand that she has something else with her that I haven't got."*  
12

13  
14 AHC could also mean that advantage is taken of the power inherent of one's position,  
15  
16 symbolised by, e.g., the uniforms: *"...when you put on your work clothes, then you have a*  
17  
18 *kind of...how to say it, a power position."*  
19

### 20 21 22 23 **Unacceptable: you are bound to act!**

24  
25 The informants were prone to positioning themselves against AHC by, e.g., talking about how  
26  
27 they had (re)acted against AHC, and that it could be done in a good way, *"...but then I think*  
28  
29 *you have an obligation... to rebuke. In a loving way."* They also emphasised that the  
30  
31 bystander had a very important role in noticing and stopping or preventing AHC, *"because*  
32  
33 *sometimes I think that it is the person who stands by...maybe more often senses when*  
34  
35 *something goes wrong than the person who is [active] in the situation".*  
36  
37

38  
39 There were different strategies for intervening against potentially abusive situations:

40  
41 One informant was concerned about open doors and meant that staff leaving doors open  
42  
43 jeopardised a patient's integrity. She was struggling with this problem:

44  
45 *"...it is an indication that you probably can't miss [with laughter in her voice]. No, but*  
46  
47 *sometimes when you have been sitting in the auxiliaries' expedition, there is just a sliding*  
48  
49 *door...there are patients sitting right outside and then I close the door...or when*  
50  
51 *you...hear...that they...are in a room talking and so on. Close the doors...and I close that*  
52  
53 *door [the sliding door] and then it's open again! And I close it."*  
54

55  
56 Practical arrangements for preventing AHC were discussed:  
57  
58  
59  
60

1  
2  
3 *"...there are more discussions about this [now]. About...for example, open the door into a*  
4 *room where a patient is and...how to **place** patients in a room, and how many really have to*  
5 *come into a room. So, these kinds of questions."*  
6  
7  
8

9  
10 It was also put forward that small talks over a cup of coffee could raise awareness about AHC  
11 among staff, but to talk to the patient, either before or after AHC had occurred, was seldom  
12 mentioned as an intervention. One informant interpreted this particular kind of silence as fear:

13  
14  
15 *"It must be some kind of ...fear to...realise that you are not perfect. Maybe!...Of course if you*  
16 *ask then you have to be prepared...to do something about what the patient might bring up."*  
17  
18  
19

20  
21 In other words, asking a patient about AHC might force staff to take action, e.g., towards a  
22 colleague. Some informants stressed the importance of being earnest in such situations and  
23 talk directly to the staff involved as soon as possible. This was what the informant did who  
24 told us about the patient who expected to be examined by a female gynaecologist. When she  
25 had comforted the patient she asked her if she could talk to the staff member who had  
26 examined her, and if the patient wanted to participate in such a meeting. The patient declined t  
27  
28 *"...I was allowed to tell...how she had experienced it...I was so disturbed by what she told*  
29 *me. So I felt that I had to find out if that was how it had happened. But he had not really*  
30 *experienced it that way..."*  
31  
32  
33  
34  
35  
36  
37  
38  
39

40  
41 Furthermore, there was a possibility to report upwards in the hierarchy: *"I would not hesitate*  
42 *to...contact...[silence] a foreman, my bosses [if a patient was abused]."* And there was a  
43 consensus on having an open climate at the clinic, and that it was important to be made aware  
44 when a patient was abused. Speaking up against AHC was considered an option for most  
45 informants:  
46  
47  
48  
49  
50

51  
52 *"That you say, 'you can't behave like that'. So I believe that...people would tell you...I*  
53 *believe that there are few who would not dare to speak up...I believe they would speak to a*  
54 *colleague."*  
55  
56  
57  
58  
59  
60

## Ubiquitous

AHC was often described in a broad sense as something that can happen to anyone at any age: patients, staff, relatives and friends to the patient. Anybody can become a victim or an agent (actor or bystander) of AHC: *“...we are abusing each other...all the way down to the patient...”*

AHC was also interpreted as staff being abusive against other staff, for instance by making remarks in a harsh way. It was also pointed out that a patient who had witnessed staff treating each other badly might feel hesitant to ask even important questions for their own sake.

One abusive situation between members of staff described as common was when a midwife called for a doctor and that doctor called for another doctor, and the two of them did not involve the midwife when they discussed the patient.

It was also hypothesised that staff experiencing abuse from other staff might subconsciously take it out on someone else: *“...if I am abused then I will look for someone...that...I have power over.”* And that someone is likely to be a patient: *“...it is easier to abuse when there is some kind of power relation... and when there is a kind of malady between us.”*

However, patients abused by staff were considered the most serious kind of AHC: *“...the most serious is if we, the staff...abuse patients or relatives. That is another situation I believe.”*

Informants also agreed that patients were the most common victims of AHC, and that if patients abused staff it should be understood differently: *“Because there might be...patients who abuse staff in many ways, so to say. But on the other hand, they are in another position...worry can turn you...rather nasty, really.”*

### Unintentional

AHC was believed to be a common experience among patients. Most informants said that AHC was usually unintentional on behalf of the staff, and that often involved staff was not even aware that it had happened. *“...they are not aware, surely. But then I have to...become aware of how people might experience what I do.”*

A variety of explanations of the occurrence of AHC were brought forward, and it was pointed out several times that AHC did not come from evilness in staff members, but rather from a lack of consideration and empathy.

Not being reflective could result in a routine manner or performance. One example given was that of an authority, like the gynaecologist who was often believed to be under time restraints, who simply follows an old habit: focusing on getting things done instead of on the patient. *“...it’s so easy to follow... the same footsteps all the time...”*

Another example of unintentional AHC was when staff members made jokes between themselves about, e.g., someone being fat, and other staff members were laughing without reflecting on what they were laughing at, or if they ought to put an end to it.

It was also brought forward that unawareness of AHC could be due to inadequate communication skills, e.g., if staff was not sensible enough to read the patient’s body language.

The uniqueness in each and everyone’s characters was appreciated, but sometimes, if a colleague was known to be harsh without meaning it or even noticing it her- or himself, there was a moral conflict. A bystanding staff member would in such a situation understand that the patient might feel abused, and at the same time know that the “harsh” staff member did not mean to abuse the patient. This was considered a difficult situation, but as one informant concluded,



1  
2  
3 “...it’s about personality, too, so it’s really difficult to know how to tackle it. It’s interesting  
4 that people are different, but on the other hand you don’t want those differences to befall the  
5 patients so that they feel abused, or maltreated.”  
6  
7  
8  
9

### 10 11 **Relative**

12  
13 The informants were provoked by the word “abuse” in AHC, and prone to take a defending  
14 position against it. They thought of “abuse” (kränkning in Swedish) as a very strong word,  
15 that was sometimes used too often and in an inappropriate way. The informants thought that,  
16 especially in the rest of the society (outside the hospital), the word “abuse” had suffered  
17 inflation. “I think that ‘abuse’ may be a tough word...It’s a worn out word or a word that is  
18 used incorrectly...”  
19  
20  
21  
22  
23  
24  
25  
26

27 Informants agreed that AHC was a difficult concept to define. On the one hand, AHC was  
28 considered a strong word, and yet AHC could be a small thing. “...there is no such...scientific  
29 quantitative concept [saying] that this is abuse.”  
30  
31  
32  
33

34 The wording seemed important to the informants and a more neutral word for AHC was  
35 desired by some of the informants, e.g., (negative) encounters (bemötande in Swedish).  
36 AHC was considered a personal experience, and it was expressed that patients were more or  
37 less vulnerable to this experience. It was also brought forward that there were reasonable  
38 experiences that made some patients more vulnerable to AHC than others, e.g., through a  
39 history of abuse.  
40  
41  
42  
43  
44  
45  
46  
47  
48

### 49 **Core category**

50  
51 The three categories ‘Dehumanising the patient’, ‘unacceptable: you are bound to act!’ and  
52 ‘ubiquitous’ are strongly linked to each other in many ways, not the least because of their  
53 potentially patient protective components. The category ‘Dehumanising the patient’ implies  
54  
55  
56  
57  
58  
59  
60

1  
2  
3 not being seen as a human being, stripped of human value. The codes that filled out this  
4  
5 category were characterised by moral imagination and respect for the patient's situation. The  
6  
7 informants showed great insight into patients' vulnerability and their own responsibility in  
8  
9 relation to AHC. The fact that the informants gave several detailed examples of AHC  
10  
11 underlined their emotional engagement. This engagement was a strong reason for staff to  
12  
13 adopt a clear position against AHC, expressed in the category 'unacceptable: you are bound to  
14  
15 act!' It was also made clear that acting against AHC was beneficial not only for the patient but  
16  
17 also for staff: "...that's what we really ought to do [talk to each other when we think a patient  
18  
19 might feel abused] ...we take responsibility for each other that way."

20  
21  
22 The category 'ubiquitous', indicated that the informants were now more prone to recognise  
23  
24 AHC. This openness could be seen as a mediator that enabled staff to talk about AHC, which  
25  
26 probably contributed to a milieu where staff felt some pressure to also act against AHC.  
27  
28

29  
30 However, there were contradictions in the staff's definitions of AHC. To claim that AHC was  
31  
32 'unintentional' was a way to describe a fact, and at the same time make AHC trivial.

33  
34 Likewise, the discussion that rendered a 'relative' definition of AHC could be seen as a  
35  
36 diversion from a topic that provoked awkward feelings. Both of these categories could be  
37  
38 used to legitimize AHC.  
39  
40  
41  
42  
43  
44  
45  
46  
47  
48  
49  
50  
51  
52  
53  
54  
55  
56  
57  
58  
59  
60

## DISCUSSION

This study focuses staff members' perception towards AHC after an intervention based on Forum Play.

### Comparing interviews from before and after the intervention

In our pre-intervention studies, staff reported detached perceptions of AHC and AHC had a taboo status at the study clinic. [17, 18] They recognised AHC as 'transgressions of ethical principles' but stated that these actions were often justifiable from a staff perspective for various reasons. [17] Staff's awareness of AHC also turned out to be a complex phenomenon restricted by their possibilities to act e.g., caused by hierarchies or because they did not know what to do since they had no tools or training in handling AHC. [18] The strongest expressions of change in the present study, when compared to the pre-intervention studies, was the *increased* awareness about AHC, *stronger* empathy for patients displayed in *more* concrete examples of, and *fewer* explanations, justifications and trivialisations of AHC. The increase of concrete examples of AHC that staff had seen or heard of was most likely a manifestation of the increased awareness of AHC among staff [18].

Moreover, the answers to the question, "what is AHC?" in the present study, are closer to the experiences of both female and male patients than those of the study that posed the same question to staff prior to the intervention, where the core category was 'ethical lapses'. [15-17] Apparently, staff's perception of AHC were closer to the patient's perspective.

### **The core category**

Despite the “resistance” we found, the overall finding is that AHC summons responsibility and urges an itch to act among staff. From having been considered a matter of mishaps - “ethical lapses” - AHC had become “a summoning stone in the shoe” [17]. By this is meant that acting against AHC had become an imperative.

The imperative to act against AHC in the present study stands out as the most important finding. The possible mechanisms for this finding could be that, 1. Forum Play had showed staff that there were possibilities to act, and 2) the taboo status of AHC had been broken at the clinic. The informants told us that AHC was present more often in their daily conversations, and it was even discussed during coffee breaks, i.e. AHC had become a shared problem. According to Galtung, direct events of violence are nurtured and legitimised by cultural and structural violence, forming a vicious triangle. [20, 23] While events of direct violence often are visible, cultural and structural violence are often not. A taboo can exemplify cultural violence. Breaking the taboo could be seen as a way to delegitimize direct events of AHC, and Forum play may have been a useful tool for this purpose since the “culture” had changed, and talking about and acting against AHC had become “the right thing to do”. However, it cannot be ruled out that any intervention against AHC that merely drew attention to the topic would have been useful. Therefore it would be interesting to compare different strategies to counteract AHC in future studies.

### **From disavowal to responsibility**

The resistance against and disavowal of AHC found in the pre-intervention studies had not only decreased, it had also changed character. [17, 18] For example, before the intervention informants strongly emphasized that they were abused too. Now they had attained a more general and less defensive view; anybody could get involved in AHC as an actor or a victim.

1  
2  
3 Moreover, it was considered much worse if a patient was abused by staff, because staff had  
4 more powerful positions than patients and they were entrusted with the patients' vulnerability.  
5  
6  
7 AHC was still considered to be acted out unintentionally, but the argument was no longer  
8  
9  
10 used to explain or justify AHC. Instead it was used as an incentive to become more aware  
11  
12 about AHC.

13  
14 How to define AHC was still problematic to the informants. Obviously AHC had been a new  
15  
16 terminology for them, but the wish to rename AHC into a more "comfortable" concept is  
17  
18 interesting. It is likely that the concept AHC gradually will be exchanged for the more neutral  
19  
20 "a failing encounter" at this clinic.  
21

### 22 23 24 25 **Limitations**

26  
27 One of the study limitations is that it is based on few interviews; only ten out of 21 informants  
28  
29 took part in the follow up study. In spite of this drawback we could establish that no new  
30  
31 substantive codes emerged after the fourth interview. Early saturation indicates that there  
32  
33 were more similarities than differences in staff's experiences of AHC. Six more interviews  
34  
35 were conducted to fill up categories and assure saturation, but it cannot be ruled out that yet  
36  
37 another interview could have added new information or that people who declined to  
38  
39 participate in the follow up interviews might have had very different views to those who did  
40  
41 participate.  
42  
43

44  
45 To conduct qualitative follow-up interviews gave us a deeper understanding of changes that  
46  
47 might have been pointed out but not have been thoroughly explained by means of e.g.  
48  
49 repeated quantitative measures. On the other hand, the approach also involves risks, e.g. the  
50  
51 authors' involvement in the project could be assumed to increase the risk for bias both on  
52  
53 behalf of the researchers, i.e. doing interpretations favourable to the project's success rate, as  
54  
55 well as on behalf of the informants, i.e., a social desirability bias. [36] In an effort to  
56  
57  
58  
59  
60

1  
2  
3 counteract these biases, external independent researchers repeated interviews as well as  
4  
5 analyses. An external researcher analysed de novo the interviews in the present study. This  
6  
7 analysis also showed that staff's perception of AHC had approached the patient perspective  
8  
9 [37]. New interviews were conducted by a consultant who was not involved in the project and  
10  
11 with a different sample of staff who had also participated in the intervention. The results  
12  
13 described a positive change from before till after the intervention, not only in perception but  
14  
15 also in actions. Several examples were given where staff members had been "experimenting"  
16  
17 with different ways to prevent or handle AHC, also where it meant confronting a colleague.  
18  
19  
20  
21 [38]  
22  
23  
24

## 25 CONCLUSION

26  
27  
28  
29 In this follow-up study staff's perception of AHC were closer to the patient's perspective.  
30  
31 Compared to the pre intervention interviews staff showed a greater willingness not only to  
32  
33 acknowledge AHC, but also to take on a responsibility to act in order to stop or prevent AHC.  
34  
35 Explanations for this stance could be that Forum Play had showed staff that there were  
36  
37 possibilities to act, and that the taboo status of AHC had been broken at the clinic.  
38  
39  
40  
41  
42  
43  
44  
45  
46  
47  
48  
49  
50  
51  
52  
53  
54  
55  
56  
57  
58  
59  
60

1  
2  
3 **REFERENCES**  
4  
5  
6

- 7 1. McFadden KL, Stock GN, Gowen CR, 3rd. Exploring strategies for reducing hospital  
8 errors. *J Healthc Manag* 2006;**51**(2):123-35; discussion 36.
- 9 2. Sutcliffe KM, Lewton E, Rosenthal MM. Communication failures: An insidious contributor  
10 to medical mishaps. *Acad Med* 2004;**79**(2):186-94.
- 11 3. Coyle J, Williams B. Seeing the wood for the trees: defining the forgotten concept of  
12 patient dissatisfaction in the light of patient satisfaction research. *Int J Health Care*  
13 *Qual Assur Inc Leadersh Health Serv* 1999;**12**(6-7):i-ix.
- 14 4. Lamont JA, Woodward C. Patient-physician sexual involvement: a Canadian survey of  
15 obstetrician-gynecologists. *Can Med Assoc J* 1994;**150**(9):1433-9.
- 16 5. Bruggemann AJ, Wijma B, Swahnberg K. Abuse in health care: a concept analysis. *Scand J*  
17 *Caring Sci* 2012;**26**(1):123-32.
- 18 6. Wijma B, Schei B, Swahnberg K. NorAQ. The NorVold Abuse Questionnaire. Linköping:  
19 Division of Gender and Medicine, Faculty of Health Sciences, Linköping University,  
20 2004.
- 21 7. Wijma B, Schei B, Swahnberg K et al. Emotional, physical, and sexual abuse in patients  
22 visiting gynaecology clinics: a Nordic cross-sectional study. *Lancet*  
23 2003;**361**(9375):2107-13.
- 24 8. Swahnberg K. Prevalence of gender violence. Studies of four kinds of abuse in five Nordic  
25 countries [Doctoral Thesis]. Faculty of Health Sciences, Linköping University, 2003.
- 26 9. Swahnberg K. NorVold Abuse Questionnaire for men (m-NorAQ): validation of new  
27 measures of emotional, physical, and sexual abuse and abuse in health care in male  
28 patients. *Gend Med* 2011;**8**(2):69-79.
- 29  
30  
31  
32  
33  
34  
35  
36  
37  
38  
39  
40  
41  
42  
43  
44  
45  
46  
47  
48  
49  
50  
51  
52  
53  
54  
55  
56  
57  
58  
59  
60

10. Swahnberg K, Wijma B. The NorVold Abuse Questionnaire (NorAQ): Validation of new measures of emotional, physical, and sexual abuse, and abuse in the health care system among women. *Eur J Public Health* 2003;**13**(4):361-6.
11. Swahnberg K, Schei B, Hilden M et al. Patients' experiences of abuse in health care: a Nordic study on prevalence and associated factors in gynecological patients. *Acta Obstet Gynecol Scand* 2007;**86**(3):349-56.
12. Swahnberg K, Davidsson J, Hearn J et al. Men's experiences of emotional, physical and sexual abuse, and abuse in health care: A cross-sectional study of a Swedish random male population sample. *Scand J Public Health*. In press 2011.
13. Swahnberg K, Hearn J, Wijma B. Prevalence of perceived experiences of emotional, physical, sexual, and health care abuse in a Swedish male patient sample. *Violence and Victims* 2009;**24**(2):275-86.
14. Swahnberg K, Wijma B, Schei B et al. Are sociodemographic and regional and sample factors associated with prevalence of abuse? *Acta Obstet Gynecol Scand* 2004;**83**(3):276-88.
15. Swahnberg K, Thapar-Bjorkert S, Bertero C. Nullified: women's perceptions of being abused in health care. *J Psychosom Obstet Gynaecol* 2007;**28**(3):161-7.
16. Swahnberg K, Wijma B, Hearn J et al. Mentally pinioned: Men's perceptions of being abused in health care. *Int J Mens Health* 2009;**8**(1):60-71.
17. Swahnberg K, Zbikowski A, Wijma B. Ethical lapses: staff's perception of abuse in health care. *J Psychosom Obstet Gynaecol* 2010;**31**(3):123-9.
18. Swahnberg K, Wijma B. Staff's awareness of abuse in health care varies according to context and possibilities to act. *J Psychosom Obstet Gynaecol* 2011;**32**(2):65-71.
19. Boal A. *Games for actors and non-actors*. London/NewYork: Routledge, 1992.
20. Galtung J. Violence, Peace and Peace Research. *J Peace Research* 1969;**6**:167-91.



- 1  
2  
3 21. Glover J. *Humanity. A moral history of the twentieth century*. London: Pimlico, 2001.  
4  
5 22. Zimbardo P. *The Lucifer effect. Understanding how good people turn evil*. New York:  
6  
7 Random House, Inc, 2008.  
8  
9 23. Galtung J. Cultural Violence. *J Peace Research* 1990;**27**(3):291-305.  
10  
11 24. Beck J. *Cognitive therapy: basics and beyond*. New York: The Guilford Press, 1995.  
12  
13 25. Fonn S, Mtonga AS, Nkoloma HC et al. Health providers' opinions on provider-client  
14 relations: results of a multi-country study to test Health Workers for Change. *Health*  
15 *Policy Plan* 2001;**16 Suppl 1**:19-23.  
16  
17 26. Fonn S, Xaba M. Health Workers for Change: developing the initiative. *Health Policy*  
18 *Plan* 2001;**16 Suppl 1**:13-8.  
19  
20 27. Ammentorp J, Kofoed P-E. Being a patient in your own department. *Patient Educ Couns*  
21 2010;**81**:142-3.  
22  
23 28. Freire P. *Pedagogy of the Oppressed - Divide and Oppress*. Casa De Las Americas  
24 1986(159):148-51.  
25  
26 29. Österlind E. Acting out of habits – can Theatre of the Oppressed promote change? Boal's  
27 theatre methods in relation to Bourdieu's concept of habitus. *Research in Drama*  
28 *Education: The Journal of Applied Theatre and Performance* 2008;**13**(1):71-82.  
29  
30 30. Stocker SS. *Staging the Moral Imagination in the Health Care Setting*. Linköping:  
31 Division of Gender and Medicine, Faculty of Health Sciences, Linköping University,  
32 2011.  
33  
34 31. Josephson A. *Praktisk kunskap i att förhindra kränkningar. Rapport om dramapedagogiskt*  
35 *arbete med vårdpersonal (Practical knowledge in counteracting abuse in health care.*  
36 *Report on drama pedagogic work among health care staff)*. Linköping: Division of  
37 Gender and Medicine, Faculty of Health Sciences, Linköping University, 2011.  
38  
39 32. Glaser B. *Theoretical sensitivity*. 4 ed. Mill Valley, CA: Sociology Press, 1978.  
40  
41  
42  
43  
44  
45  
46  
47  
48  
49  
50  
51  
52  
53  
54  
55  
56  
57  
58  
59  
60

- 1  
2  
3 33. Glaser B. *Basics of grounded theory analysis. Emergence versus forcing*. Mill Valley,  
4  
5 CA: Sociology Press, 1992.  
6  
7 34. Morse JM, editor. *Developing grounded theory. The second generaton*. Walnut Creek:  
8  
9 Left coast press, INC, 2009.  
10  
11 35. Charmaz K. *Constructing Grounded Theory. A practical guide through qualitative*  
12  
13 *analysis*. London: SAGE Publications Ltd, 2009.  
14  
15  
16 36. Saunders DG. Procedures for adjusting self-reports of violence for social desirability bias.  
17  
18 *J Interpersonal Violence* 1991;6(3):336-44.  
19  
20 37. Swahnberg K, Berterö C. Minimizing human dignity: staff's perception of abuse in health  
21  
22 care. *Accepted* 2012.  
23  
24  
25 38. Nilsson A. Evaluering av projektet "kränkningar i vården" (Evaluation of the project  
26  
27 "abuse in health care"). In: Swahnberg K, editor. Linköping: Division of Gender and  
28  
29 Medicine, Faculty of Health Sciences, Linköping University, 2010.  
30  
31  
32  
33  
34  
35  
36  
37  
38  
39  
40  
41  
42  
43  
44  
45  
46  
47  
48  
49  
50  
51  
52  
53  
54  
55  
56  
57  
58  
59  
60

**Table 1. Questions in NorAQ about abuse in health care.**

|                | <b>ABUSE IN HEALTH CARE</b>                                                                                                                                                                                                                                                    |
|----------------|--------------------------------------------------------------------------------------------------------------------------------------------------------------------------------------------------------------------------------------------------------------------------------|
| Mild abuse     | Have you ever felt offended or grossly degraded while visiting health services, felt that someone exercised blackmail against you or did not show respect for                                                                                                                  |
| Moderate abuse | your opinion - in such a way that you were later disturbed by or suffered from the experience?<br>Have you ever experienced that a "normal" event while visiting health services, suddenly became a really terrible and insulting experience, without you fully                |
| Severe abuse   | knowing how this could happen?<br><br>Have you experienced anybody in health service purposely - as you understood - hurting you physically or mentally, grossly violating you or using your body and your subordinated position to your disadvantage for his/her own purpose? |
|                | <b>ANSWER ALTERNATIVES (THE SAME FOR ALL QUESTIONS)</b>                                                                                                                                                                                                                        |
|                | 1 = No, 2 = Yes, as a child (<18 years), 3 = Yes, as an adult (≥18 years), 4 = Yes, as a child and as an adult                                                                                                                                                                 |

**Table 2. Categories and Core category answering the research question: what is abuse in health care?**

| Categories                            | Function?                        | Core category                                          |
|---------------------------------------|----------------------------------|--------------------------------------------------------|
| Abuse in health care is:              |                                  |                                                        |
| Relative 7                            | Legitimizing AHC?                | Abuse in health care is a summoning stone in the shoe! |
| Unintentional 8                       | Legitimizing AHC?                |                                                        |
| Unacceptable: you are bound to act! 8 | Protecting the patient from AHC? |                                                        |
| Ubiquitous 9                          | Protecting the patient from AHC? |                                                        |
| Dehumanising the patient 10           | Protecting the patient from AHC? |                                                        |

Note: Figures represent the number of interviews represented in each category.

**Consolidated criteria for reporting qualitative studies (COREQ):  
32-item checklist**

Developed from:

Tong A, Sainsbury P, Craig J. Consolidated criteria for reporting qualitative research (COREQ): a 32-item checklist for interviews and focus groups. *International Journal for Quality in Health Care*. 2007. Volume 19, Number 6: pp. 349 – 357

**YOU MUST PROVIDE A RESPONSE FOR ALL ITEMS. ENTER N/A IF NOT APPLICABLE**

| No. Item                                       | Guide questions/description                                                                                                                              | Reported on Page #                                |
|------------------------------------------------|----------------------------------------------------------------------------------------------------------------------------------------------------------|---------------------------------------------------|
| <b>Domain 1: Research team and reflexivity</b> |                                                                                                                                                          |                                                   |
| <i>Personal Characteristics</i>                |                                                                                                                                                          |                                                   |
| 1. Inter viewer/facilitator                    | Which author/s conducted the <u>inter view</u> or focus group?                                                                                           | KS and BW                                         |
| 2. Credentials                                 | What were the researcher's credentials? E.g. PhD, MD                                                                                                     | PhD/PhD                                           |
| 3. Occupation                                  | What was their occupation at the time of the study?                                                                                                      | BW: Senior consultant gynaecologist<br>KS: Nurse  |
| 4. Gender                                      | Was the researcher male or female?                                                                                                                       | F / F                                             |
| 5. Experience and training                     | What experience or training did the researcher have?                                                                                                     | academic training<br>professor / ass. professor   |
| <i>Relationship with participants</i>          |                                                                                                                                                          |                                                   |
| 6. Relationship established                    | Was a relationship established prior to study commencement?                                                                                              | Informal meeting                                  |
| 7. Participant knowledge of the interviewer    | What did the participants know about the researcher? e.g. personal goals, reasons for doing the research                                                 | professor's<br>results from<br>earlier research   |
| 8. Interviewer characteristics                 | What characteristics were reported about the inter viewer/facilitator? e.g. Bias, assumptions, reasons and interests in the research topic               | Engagement in<br>the intervention<br>is discussed |
| <b>Domain 2: study design</b>                  |                                                                                                                                                          |                                                   |
| <i>Theoretical framework</i>                   |                                                                                                                                                          |                                                   |
| 9. Methodological orientation and Theory       | What methodological orientation was stated to underpin the study? e.g. grounded theory, discourse analysis, ethnography, phenomenology, content analysis | Grounded<br>theory                                |
| <i>Participant selection</i>                   |                                                                                                                                                          |                                                   |
| 10. Sampling                                   | How were participants selected? e.g. purposive, convenience, consecutive, snowball                                                                       | Convenience                                       |
| 11. Method of approach                         | How were participants approached? e.g. face-to-face, telephone, mail, email                                                                              | face to face<br>by coordinators                   |
| 12. Sample size                                | How many participants were in the study?                                                                                                                 | 10                                                |

|                                        |                                                                                                                                 |                                    |
|----------------------------------------|---------------------------------------------------------------------------------------------------------------------------------|------------------------------------|
| 13. Non-participation                  | How many people refused to participate or dropped out? Reasons?                                                                 | 11 Not eligible<br>& 4 refused     |
| <i>Setting</i>                         |                                                                                                                                 |                                    |
| 14. Setting of data collection         | Where was the data collected? e.g. home, clinic, workplace                                                                      | clinic                             |
| 15. Presence of non-participants       | Was anyone else present besides the participants and researchers?                                                               | NO                                 |
| 16. Description of sample              | What are the important characteristics of the sample? e.g. demographic data, date                                               | Different<br>shift categories      |
| <i>Data collection</i>                 |                                                                                                                                 |                                    |
| 17. Interview guide                    | Were questions, prompts, guides provided by the authors? Was it pilot tested?                                                   | yes<br>not app repeated interviews |
| 18. Repeat interviews                  | Were repeat inter views carried out? If yes, how many?                                                                          | 10                                 |
| 19. Audio/visual recording             | Did the research use audio or visual recording to collect the data?                                                             | AUDIO                              |
| 20. Field notes                        | Were field notes made during and/or after the inter view or focus group?                                                        | yes                                |
| 21. Duration                           | What was the duration of the inter views or focus group?                                                                        | appr. 60 min                       |
| 22. Data saturation                    | Was data saturation discussed?                                                                                                  | yes                                |
| 23. Transcripts returned               | Were transcripts returned to participants for comment and/or correction?                                                        | NO                                 |
| <b>Domain 3: analysis and findings</b> |                                                                                                                                 |                                    |
| <i>Data analysis</i>                   |                                                                                                                                 |                                    |
| 24. Number of data coders              | How many data coders coded the data?                                                                                            | one                                |
| 25. Description of the coding tree     | Did authors provide a description of the coding tree?                                                                           | no                                 |
| 26. Derivation of themes               | Were themes identified in advance or derived from the data?                                                                     | from data                          |
| 27. Software                           | What software, if applicable, was used to manage the data?                                                                      | —                                  |
| 28. Participant checking               | Did participants provide feedback on the findings?                                                                              | —                                  |
| <i>Reporting</i>                       |                                                                                                                                 |                                    |
| 29. Quotations presented               | Were participant quotations presented to illustrate the themes/findings? Was each quotation identified? e.g. participant number | yes<br>no                          |
| 30. Data and findings consistent       | Was there consistency between the data presented and the findings?                                                              | yes                                |
| 31. Clarity of major themes            | Were major themes clearly presented in the findings?                                                                            | yes                                |
| 32. Clarity of minor themes            | Is there a description of diverse cases or discussion of minor themes?                                                          | yes                                |

Once you have completed this checklist, please save a copy and upload it as part of your submission. When requested to do so as part of the upload process, please select the file type: **Checklist**. You will NOT be able to proceed with
